# Supplementary material
Source: publisher figshare collection journal article supplement (https://acs.figshare.com/ndownloader/files/4933633)
Supplement: Supplementary file 1 [file 4933633]

Supporting Information

***In situ*-Generated Chiral Co(I)-Catalyst for Asymmetric  
[2+2+2] Cycloadditions of Triynes**

Phillip Jungk<sup>†</sup>, Fabian Fischer<sup>†</sup> and Marko Hapke<sup>\*†,‡</sup>

<sup>†</sup> Leibniz-Institut für Katalyse e.V. an der Universität Rostock, Albert-Einstein-Strasse 29a,  
D-18059 Rostock (Germany)

<sup>‡</sup> Institut für Katalyse, Johannes Kepler Universität Linz, Altenberger Strasse 69, A-4040 Linz  
(Austria)

**E-mail:** marko.hapke@catalysis.de

**Table of contents**

|                                                                                                       |    |
|-------------------------------------------------------------------------------------------------------|----|
| General methods.....                                                                                  | 2  |
| Commercially available chiral <i>P,P</i> - and <i>P,N</i> -ligands .....                              | 2  |
| Ligand screening in glass reaction vial .....                                                         | 3  |
| Chiral ligand screening for catalytic reactions with CoBr <sub>2</sub> in a reaction glass vial ..... | 3  |
| Optimization of the catalytic Rreactions with CoBr <sub>2</sub> in a Schlenk tube .....               | 4  |
| Screening of catalyst loading .....                                                                   | 4  |
| Synthesis of cobalt(II)-precursor complex <b>7</b> .....                                              | 4  |
| Oxidation of ( <i>R,aR</i> )- <i>N</i> -PINAP ( <b>6</b> ) to <b>SI-I</b> .....                       | 5  |
| Catalytic evaluation of ligand <b>SI-I</b> .....                                                      | 6  |
| Substrate screening for catalytic reactions .....                                                     | 6  |
| Synthesis of cyclization substrates .....                                                             | 7  |
| Characterization of cyclization products .....                                                        | 7  |
| NMR spectra of compound <b>SI-I</b> : .....                                                           | 13 |
| HPLC analysis:.....                                                                                   | 15 |
| References: .....                                                                                     | 39 |

## General methods

All experiments were carried out under inert gas atmosphere (argon) in flame dried Schlenk tubes or glass reaction vials. The anhydrous solvents (tetrahydrofuran, toluene, dichloromethane and *n*-hexane) were dried in a solvent purification system MD-5 from Inert (former Innovative Technology). All NMR spectra were recorded on a Bruker AV 300, AV 400 or Fourier 300 NMR spectrometer. HPLC-analysis was performed on a Hewlett Packard HP 1100 with DAD, chiralizer and RI-detector and chiral columns. HRMS (ESI-TOF) was performed at a Agilent 6210 Time-of-Flight LC/MS. Elemental analysis was performed at a Perkin Elmer AAS-Analyst 300 (Co), Leco Microanalyser-TruSpec CHNS (C, H), Radiometer Analytical SAS (Titrator) Titrab 870-TIM 870 (Br) and a Perkin Elmer UV/VIS-spectrometer Lambda 2 (P).

CoBr<sub>2</sub> (0.05 M) and ZnI<sub>2</sub> (0.25 M) were used as solutions in dry THF.

## Commercially available chiral *P,P*- and *P,N*-ligands

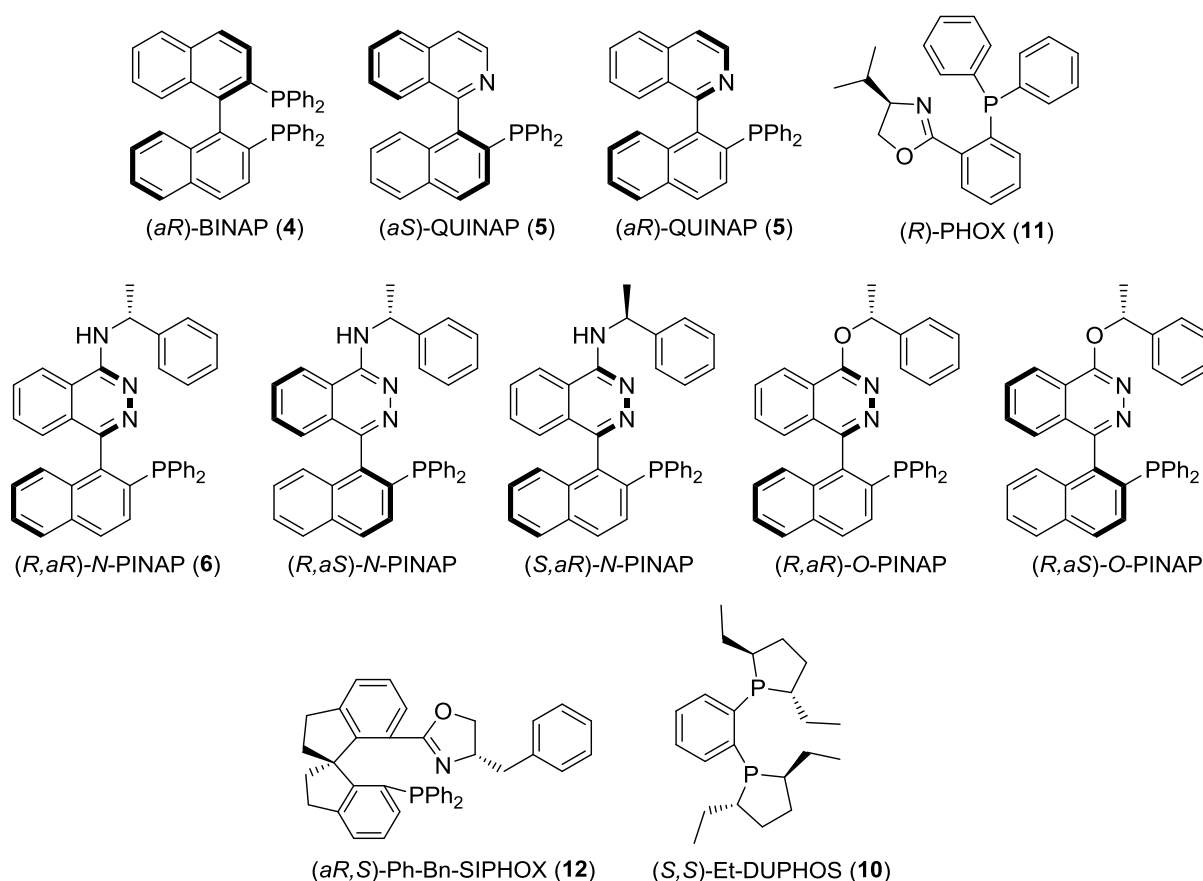

**Scheme S1:** Available chiral *P,P*- and *P,N*-ligands

## Ligand screening in glass reaction vial

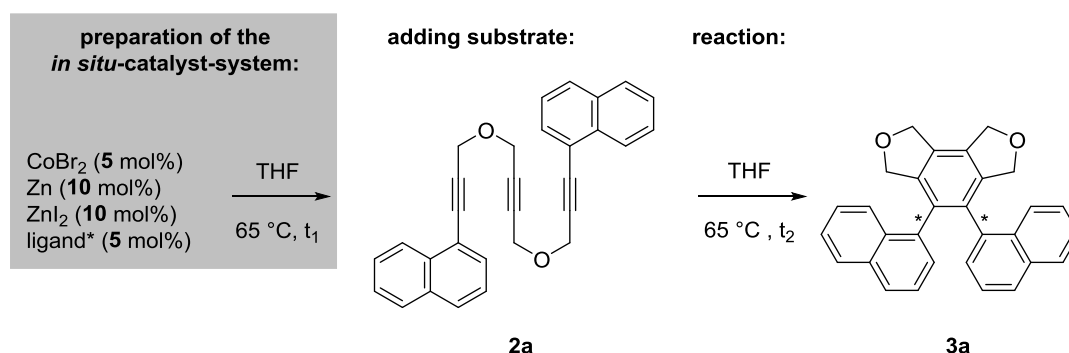

**Table S1.** Screening of chiral ligands in reaction glass vial under “semi-oxygen free” conditions

| Entry | Chiral ligand                                  | t <sub>1</sub><br>[h] | t <sub>2</sub><br>[h] | yield<br>[%]      | d/l:<br><i>meso</i> <sup>[a]</sup> | Sel. <sup>[b]</sup><br>[% <i>ee</i> ] |
|-------|------------------------------------------------|-----------------------|-----------------------|-------------------|------------------------------------|---------------------------------------|
| 1     | no ligand                                      | 0.5                   | 40                    | 73 <sup>[c]</sup> | 1.4:1                              | --                                    |
| 2     | ( <i>aR</i> )-BINAP ( <b>4</b> )               | 5 min                 | 17                    | 58                | 1.3:1                              | --                                    |
| 3     | ( <i>aR</i> )-QUINAP ( <b>5</b> )              | 0.5                   | 22                    | 70                | 1.4:1                              | (+)6                                  |
| 4     | ( <i>aS</i> )-QUINAP ( <b>5</b> )              | 2                     | 21                    | >95               | 1.4:1                              | (-)57                                 |
| 5     | ( <i>R</i> )-PHOX ( <b>11</b> )                | 2                     | 26                    | 77                | 1:1.2                              | (-)32                                 |
| 6     | ( <i>R, aR</i> )- <i>N</i> -PINAP ( <b>6</b> ) | 0.5                   | 16                    | 66                | 1:1.2                              | (+)17                                 |
| 7     | ( <i>R, aS</i> )- <i>N</i> -PINAP              | 0.5                   | 16                    | >95               | 1:1.3                              | (-)25                                 |
| 8     | ( <i>S, aR</i> )- <i>N</i> -PINAP              | 0.5                   | 16                    | 58                | 1:1                                | (+)11                                 |
| 9     | ( <i>R, aR</i> )- <i>O</i> -PINAP              | 0.5                   | 16                    | 51                | 1:1.4                              | --                                    |
| 10    | ( <i>R, aS</i> )- <i>O</i> -PINAP              | 0.5                   | 16                    | 63                | 1:1.5                              | --                                    |

[a] Determined by integration from the proton NMR spectra. [b] Determined by chiral HPLC. [c] Conditions: 10 mol% CoBr<sub>2</sub>, 10 mol% ZnI<sub>2</sub>, 30 mol% Zn.

## Chiral ligand screening for catalytic reactions with CoBr<sub>2</sub> in a reaction glass vial

CoBr<sub>2</sub> (5 mol% in regard to the triyne), the respective chiral ligand (5 mol% in regard to the triyne) and Zn (10 mol% in regard to the triyne) were dissolved in THF (1 mL), ZnI<sub>2</sub> (10 mol% in regard to the triyne) was added and the solution stirred at 65 °C for 5 min-2 h.

After cooling to room temperature the triyne **2a** (0.25 mmol) was added and the mixture again heated to 65 °C for 16-40 h. At the end of the reaction, the solvent was removed under reduced pressure and the residue purified by column chromatography (*c*-hexane/ethyl acetate 4:1, v/v) to yield the benzene derivative. The *ee* values were determined by chiral HPLC-analysis. (Cellulose 2, *n*-heptane/isopropanol 95:5, v/v, 1 mL/min).

### Optimization of the catalytic reactions with CoBr<sub>2</sub> in a Schlenk tube

CoBr<sub>2</sub> (1-5 mol% in regard to the triyne), the respective chiral ligand (1-5 mol% in regard to the triyne), Zn (2-10 mol% in regard to the triyne) were dissolved in THF (1 mL), ZnI<sub>2</sub> (2-10 mol% in regard to the triyne) was added and the solution stirred at 0-65 °C for 1-2 h. After the triyne **2a** (0.25 mmol) was added the mixture was again stirred at 0-65 °C for 6-27 h. At the end of the reaction, the solvent was removed under reduced pressure and the residue purified by column chromatography (*c*-hexane/ethyl acetate 4:1, v/v) to yield the benzene derivative. The *ee* values were determined by chiral HPLC-analysis. (Cellulose 2, *n*-heptane/isopropanol 95:5, v/v, 1 mL/min).

### Screening of catalyst loading

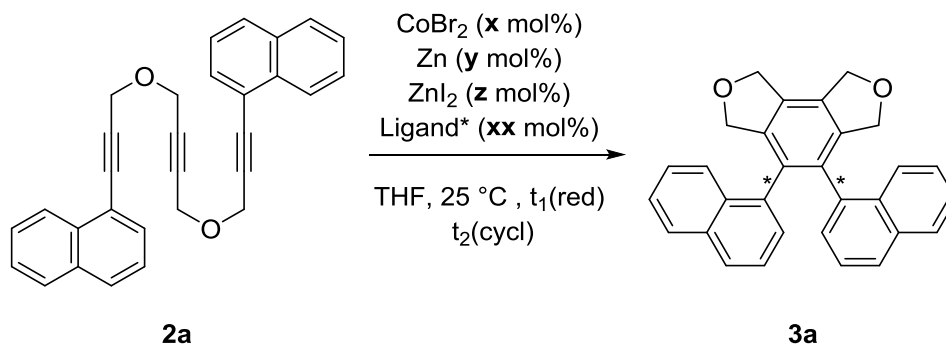

**Table S2.** Screening of the catalysts loading

| # | x      | y | z | ligand*                                    | t <sub>1</sub> | t <sub>2</sub> | yield | <i>d/l</i> :               | Sel.                          |
|---|--------|---|---|--------------------------------------------|----------------|----------------|-------|----------------------------|-------------------------------|
|   | [mol%] |   |   | [mol%]                                     | [h]            | [h]            | [%]   | <i>meso</i> <sup>[a]</sup> | [% <i>ee</i> ] <sup>[b]</sup> |
| 1 | 2.5    | 5 | 5 | ( <i>aR</i> )-QUINAP ( <b>5</b> )<br>[2.5] | 1              | 4              | 73    | 1.3:1                      | (+)76                         |
| 2 | 1      | 2 | 2 | ( <i>aR</i> )-QUINAP ( <b>5</b> )<br>[1]   | 1              | 21             | 70    | 1.3:1                      | (+)81                         |

[a] determined out of the Integrals in the proton NMR spectra. [b] determined by chiral HPLC.

### Synthesis of cobalt(II)-precursor complex **7**

To a solution of (*R,aR*)-*N*-PINAP (**6**) (0.10 g, 0.18 mmol) in 8 mL THF a solution of CoBr<sub>2</sub> (3.55 mL, 0.18 mL, 0.05 M in THF) in THF was added and stirred at room temperature for 1 h. The solvent was removed in vacuo and the residue washed twice with *n*-hexane and dried in vacuo. The resulting green solid was recrystallized under argon atmosphere from a dichloromethane/THF mixture, yielding green crystals.

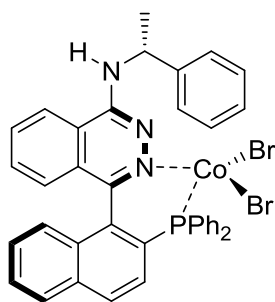

|     |        |         |        |          |         |        |
|-----|--------|---------|--------|----------|---------|--------|
| EA: | calc.: | C 58.64 | H 3.88 | Br 20.53 | Co 7.57 | P 3.98 |
|     | found: | C 58.82 | H 3.58 | Br 18.81 | Co 6.46 | P 3.88 |

**Crystal Structure data:** CCDC 1418399 contains the supplementary crystallographic data for this paper. These data can be obtained free of charge from the Cambridge Crystallographic Data Centre via [www.ccdc.cam.ac.uk/data\\_request/cif](http://www.ccdc.cam.ac.uk/data_request/cif).

### Oxidation of (*R,aR*)-*N*-PINAP (6) to SI-I

A suspension of (*R,aR*)-*N*-PINAP (**6**) (0.10 g, 0.18 mmol) in hydrogenperoxide (3.00 mL, 29.0 mmol, 30% in H<sub>2</sub>O) was stirred at room temperature for 24 h. The reaction was stopped by adding water to the solution and was extracted thrice with dichloromethane. The combined organic phases were washed with brine, dried with sodium sulfate and the solvent was evaporated. The resulting product **SI-I** was isolated as colorless oil (92 mg, 89%) without further purification.

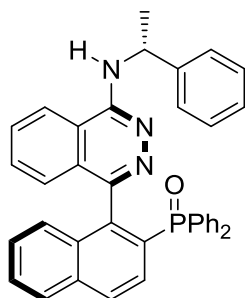

**SI-I**

**<sup>1</sup>H-NMR** (CDCl<sub>3</sub>, 300 MHz):  $\delta$  = 1.72 (d,  $J$  = 6.8 Hz, 3H), 5.38 (s<sub>br</sub>, 1H), 5.71 (p,  $J$  = 6.4 Hz, 1H), 6.26-6.34 (m, 2H), 6.65-6.72 (m, 1H), 6.83-6.87 (m, 1H), 6.87-6.91 (m, 1H), 6.95 (dt,  $J$  = 8.2, 0.9 Hz, 1H), 7.10 (dd,  $J$  = 8.5, 1.1 Hz, 1H), 7.25-7.29 (m, 1H), 7.29-7.32 (m, 1H), 7.34-7.42 (m, 4H), 7.42-7.49 (m, 2H), 7.50-7.58 (m, 3H), 7.59-7.64 (m, 2H), 7.88-7.92 (m, 1H), 7.94 (dt,  $J$  = 8.3, 1.5 Hz, 2H), 8.11 (dd,  $J$  = 8.7, 1.6 Hz, 1H), 8.28 (dd,  $J$  = 10.9, 8.7 Hz, 1H) ppm. **<sup>13</sup>C-NMR** (CDCl<sub>3</sub>, 75 MHz):  $\delta$  = 22.1, 50.2, 117.0, 119.9, 120.4, 126.6, 126.8, 126.9, 127.0, 127.1, 127.2, 127.4, 127.6, 128.0, 128.1, 128.2, 128.3, 128.4, 128.5, 128.6,

128.7, 129.1, 129.3, 129.7, 129.8, 130.5, 130.7, 130.9, 131.0, 131.1, 131.3, 131.4, 131.5, 131.6, 132.4, 132.6, 132.7, 144.2, 152.2 ppm. <sup>31</sup>P-NMR (CDCl<sub>3</sub>, 121 MHz): δ = 31.65 ppm. **HRMS** (ESI-TOF) C<sub>38</sub>H<sub>30</sub>N<sub>3</sub>OP: calc.: 576.2199 [M+H]<sup>+</sup>, 598.2019 [M+Na]<sup>+</sup> found: 576.2204 [M+H]<sup>+</sup>, 598.2025 [M+Na]<sup>+</sup>

### **Catalytic evaluation of ligand SI-I**

CoBr<sub>2</sub> (0.06 mL, 0.05 M in THF, 2.5 mol% in regard to the triyne), ligand **SI-I** (1.8 mg, 2.5 mol% in regard to the triyne), Zn (0.41 mg, 5 mol% in regard to the triyne) were dissolved in THF (1 mL), ZnI<sub>2</sub> (0.03 mL, 0.25 M in THF, 5 mol% in regard to the triyne) was added and the solution stirred at 25 °C for 1 h. After the triyne **2a** (0.1 mL, 1.25 M in THF, 0.125 mmol) was added the mixture was again stirred at 25 °C for 4 d. At the end of the reaction, the solvent was removed under reduced pressure and the residue purified by column chromatography (*c*-hexane/ethyl acetate 4:1, v/v) to yield the benzene derivative **3a** (48 mg, 93%) of a racemic mixture. The *ee* value was determined by chiral HPLC-analysis. (Cellulose 2, *n*-heptane/isopropanol 95:5, v/v, 1 mL/min).

### **Substrate screening for catalytic reactions**

Co-precursor **7** (2.5-10 mol% in regard to the triyne) or CoBr<sub>2</sub> (2.5-10 mol% in regard to the triyne) and (*aR*)-/(*aS*)-QUINAP (**5**) (2.5-10 mol% in regard to the triyne) and Zn (5-20 mol% in regard to the triyne) were dissolved in THF/toluene (1 mL) and ZnI<sub>2</sub> (5-20 mol% in regard to the triyne) was added and the solution stirred at 25-95 °C for a specific time. After cooling to room temperature the triyne **2a** (0.1-0.5 mmol) was added and the mixture again was stirred at the described temperature for a specific time. At the end of the reaction, the solvent was removed under reduced pressure and the residue purified by column chromatography to yield the benzene derivative. The *ee* values were determined by chiral HPLC-analysis.

For every compound the specific reaction conditions are written in parentheses: (amount of substrate, catalyst loading, solvent, reaction temperature, time, eluent for column chromatography, yield, *d/l:meso* ratio, aggregation state)

## Synthesis of cyclisation substrates

### Compounds 2a, 2b:

Synthesis according to the published procedure by Shibata et al. The analytical data were in accordance with the reported data.<sup>[1]</sup>

All other triynes have been synthesized by literature-known procedures we have published in preceding work and the analytical data were in accordance with the reported data.<sup>[2]</sup>

## Characterization of cyclization products

### Compound 3a:

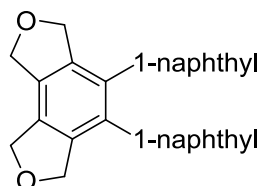

The compound was identified by NMR and MS and comparison with reported data.<sup>[1]</sup>

Optical rotation:  $[\alpha]_{\text{D}}^{22} = 224.83$  (c 1.0052,  $\text{CHCl}_3$ , 85% *ee*) obtained by the reaction described in Table 2, Entry 2.

### Compound 3b:

9-phenanthrenyl:

(0.125 mmol, 2.5 mol% **7**, THF, 25 °C, 23 h, *c*-hex/EE (4:1, v/v), 43 mg (75%), (+)30% *ee*, 1.8:1 (*d/l:meso*, HPLC area), colorless solid)

NMR data were in accordance with published data.<sup>[1]</sup>

Conditions of the HPLC-analysis: Reprosil, *n*-heptane/EtOH 90:10 (v/v), 0.5 mL/min.

### Compound 3c:

4-Me-1-naphthyl

(0.125 mmol, 2.5 mol% **7**, THF, 25 °C, 16 h, *c*-hex/EE (10:1, v/v), 51 mg (92%), (+)19% *ee*, 1.4:1 (*d/l:meso*, HPLC area), colorless solid)

NMR data were in accordance with published data.<sup>[2]</sup>

Conditions of the HPLC-analysis: Cellulose 2, *n*-heptane/Isopropanol 98:2 (v/v), 0.8 mL/min.

**Compound 3d:**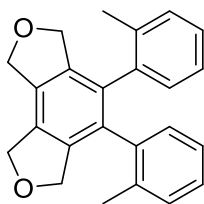

(0.25 mmol, 5 mol% **7**, THF, 65 °C, 18 h, *c*-hex/EE (4:1, v/v), 77 mg (90%), (+)15% *ee*, 1.4:1 (*d/l:meso*, HPLC area), colorless solid)

NMR data were in accordance with published data.<sup>[2]</sup>

Conditions of the HPLC-analysis: Cellulose 1, *n*-heptane/EtOH 99:1 (v/v), 0.4 mL/min.

**Compound 3e:**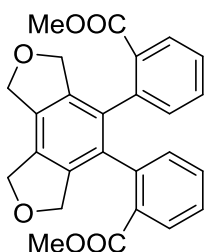

(0.125 mmol, 2.5 mol% **7**, THF, 25 °C, 17 h, *c*-hex/EE (4:1, v/v), 23 mg (42%), (+)24% *ee*, 2.7:1 (*d/l:meso*), colorless solid)

(0.25 mmol, 5 mol% (*aS*)-**5** + CoBr<sub>2</sub>, THF, 65 °C, 17 h, *c*-hex/EE (4:1, v/v), 94 mg (87%), rac, 1:1.3 (*d/l:meso*), colorless solid)

NMR data were in accordance with published data.<sup>[2]</sup>

Conditions of the HPLC-analysis: Reprosil, *n*-heptane/EtOH 95:5 (v/v), 1 mL/min.

**Compound 3f:**

4-quinolinyl

(0.125 mmol, 10 mol% **7**, THF, 25-65 °C, 7 d, *n*-hex/THF (1:2, v/v + 0.5% NEt<sub>3</sub>), 42 mg (81%), (+)46% *ee*, 1.2:1 (*d/l:meso*), yellow solid)

NMR data were in accordance with published data.<sup>[2]</sup>

Conditions of the HPLC-analysis: Eurocel, *n*-heptane/EtOH 90:10 (v/v), 0.5 mL/min.

**Compound 3g:**

4-isoquinolinyl

(0.125 mmol, 10 mol% **7**, THF, 25-65 °C, 6 d, *n*-hex/THF (1:2, v/v + 0.5% NEt<sub>3</sub>), 45 mg (86%), (-)66% *ee*, 1.2:1 (*d/l:meso*), yellow solid)



NMR data were in accordance with published data. <sup>[2]</sup>

Conditions of the HPLC-analysis: Cellulose 1, *n*-heptane/EtOH 90:10 (v/v), 1 mL/min.

### Compound 3h:

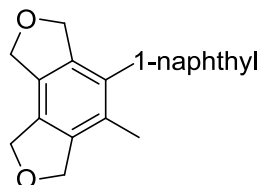

(0.25 mmol, 2.5 mol% **7**, THF, 25 °C, 17 h, *c*-hex/EE (4:1, v/v), 74 mg (>95%), (+)78% *ee*, colorless solid)

(0.25 mmol, 5 mol% (*aR*)-**5** + CoBr<sub>2</sub>, THF, 25 °C, 17 h, *c*-hex/EE (4:1, v/v), 75 mg (>95%), (+)7% *ee*, colorless solid)

NMR data were in accordance with published data. <sup>[2]</sup>

Conditions of the HPLC-analysis: Cellulose 2, *n*-heptane/isopropanol 95:5 (v/v); 0.5 mL/min.

### Compound 3i

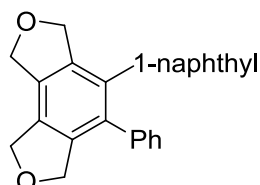

(0.25 mmol, 2.5 mol% **7**, THF, 25 °C, 19 h, *c*-hex/EE (4:1, v/v), 67 mg (74%), (-)55% *ee*, colorless solid)

(0.25 mmol, 2.5 mol-% (*aR*)-**5** + CoBr<sub>2</sub>, THF, 25 °C, 17 h, *c*-hex/EE (4:1, v/v), 86 mg (94%), (-)18% *ee*, colorless solid)

NMR data were in accordance with published data. <sup>[2]</sup>

Conditions of the HPLC-analysis: Eurocel, *n*-heptane/isopropanol 95:5 (v/v), 0.5 mL/min.

### Compound 3k:

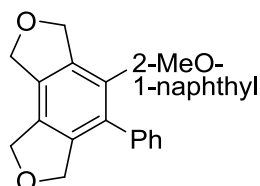

(0.25 mmol, 2.5 mol% **7**, THF, 25 °C, 19 h, *c*-hex/EE (4:1, v/v), 69 mg (70%), (+)12% *ee*, colorless solid)

NMR data were in accordance with published data. <sup>[2]</sup>

Conditions of the HPLC-analysis: Cellulose 2, *n*-heptane/isopropanol 95:5 (v/v), 0.5 mL/min.

### Compound 3l:

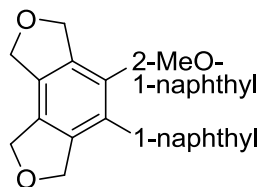

(0.125 mmol, 2.5 mol% **7**, THF, 25 °C, 15 h, *c*-hex/EE (6:1, v/v), F1: 15 mg (27%); F2: 19 mg (34%), F1: (+)39% *ee*; F2: (+)32% *ee*, colorless solid)

NMR data were in accordance with published data. <sup>[2]</sup>

Conditions of the HPLC-analysis: Cellulose 2, *n*-heptane/EtOH 95:5 (v/v), 1 mL/min.

### Compound 9a:

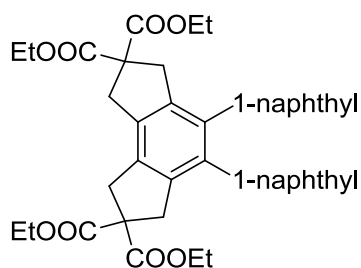

(0.125 mmol, 2.5 mol% **7**, THF, 25-65 °C, 43 h, *c*-hex/EE (4:1, v/v), 47 mg (53%), (-)78% *ee*, 2.2:1 (*d/l:meso*, HPLC area), colorless solid)

(0.125 mmol, 2.5 mol% **7**, toluene, 25-90 °C, 41 h, pentane/EE (6:1, v/v), 84 mg (>95%), (-)67% *ee*, 1.9:1 (*d/l:meso*, HPLC area), colorless solid)

NMR data were in accordance with published data. <sup>[2]</sup>

Conditions of the HPLC-analysis: Eurocel, *n*-heptane/EtOH 99:1 (v/v), 0.5 mL/min.

### Compound 9b:

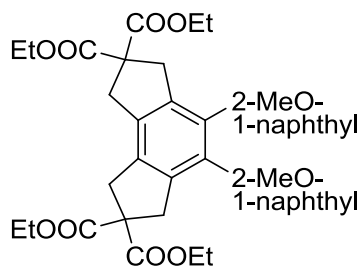

(0.125 mmol, 2.5 mol% **7**, THF, 25-65 °C, 41 h, *c*-hex/EE (4:1, v/v), 30 mg (32%), (-)13% *ee*, no *meso*-form detected), colorless solid)

NMR data were in accordance with published data. <sup>[2]</sup>

Conditions of the HPLC-analysis: Cellulose 2, *n*-heptane/EtOH 95:5 (v/v), 0.5 mL/min.

#### Compound 9c:

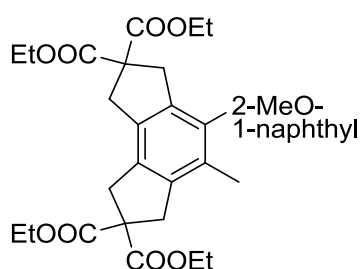

(0.25 mmol, 2.5 mol% (*aR*)-**5** + CoBr<sub>2</sub>, THF, 25-65 °C, 44 h, *c*-hex /EE (10:1, v/v), 141 mg (91%), (-)17% *ee*, yellow oil)

NMR data were in accordance with published data. <sup>[2]</sup>

Conditions of the HPLC-analysis: Cellulose 2, *n*-heptane/isopropanol 95:5 (v/v), 1 mL/min.

#### Compound 9d:

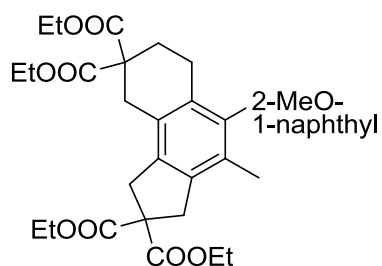

(0.15 mmol, 10 mol% **7**, toluene, 25-95 °C, 17 h, *c*-hex/EE (4:1, v/v), 60 mg (63%), (+)60% *ee*, colorless solid)

NMR data were in accordance with published data. <sup>[2]</sup>

Conditions of the HPLC-analysis: Reprosil, *n*-heptane/isopropanol 95:5 (v/v), 1 mL/min.

#### Compound 9e:

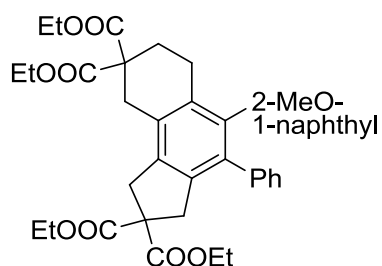

(0.15 mmol, 10 mol% **7**, toluene, 25-95 °C, 17 h, *c*-hex/EE (4:1, v/v), 90 mg (87%),  
(-)-11% *ee*, colorless sirup)

NMR data were in accordance with published data. <sup>[2]</sup>

Conditions of the HPLC-analysis: Cellulose 2, *n*-heptane/isopropanol 95:5 (v/v), 1 mL/min.

## NMR spectra of compound SI-I:

<sup>1</sup>H-NMR:

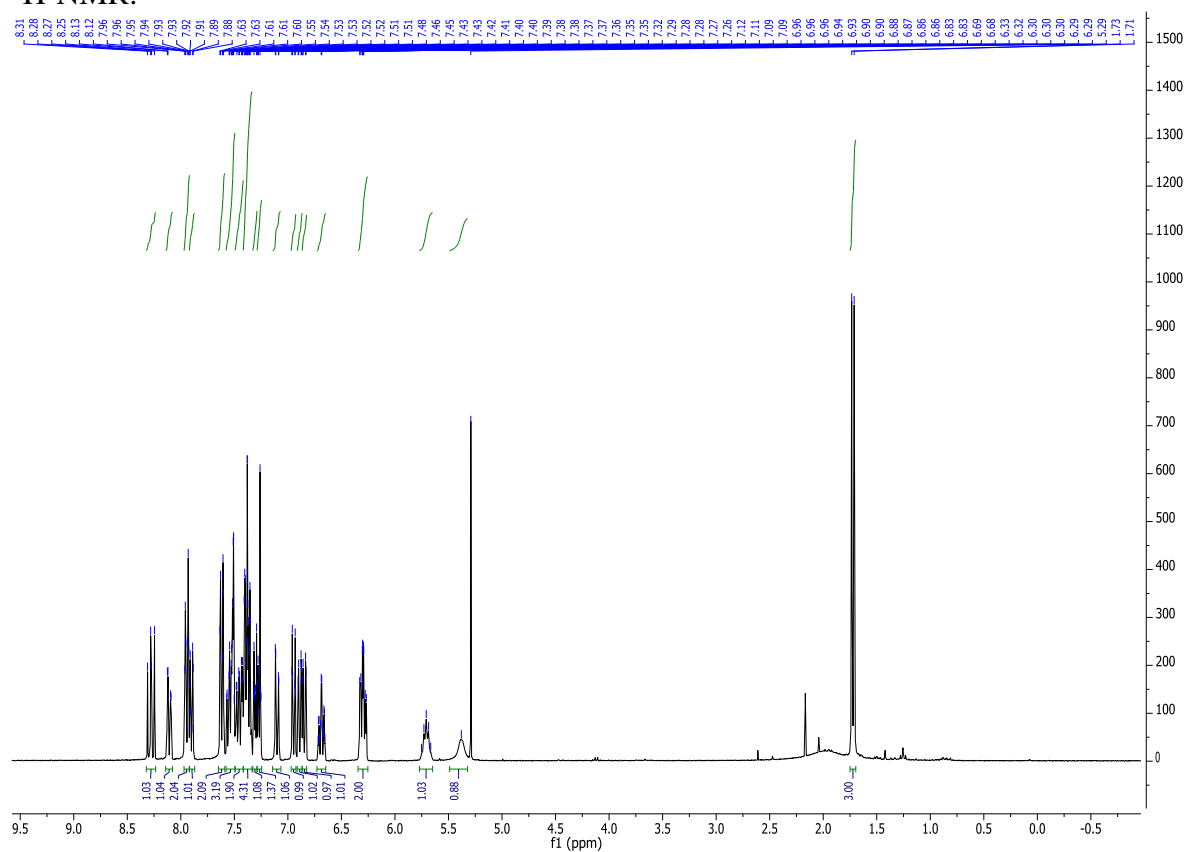

$^{31}\text{P}$ -NMR:

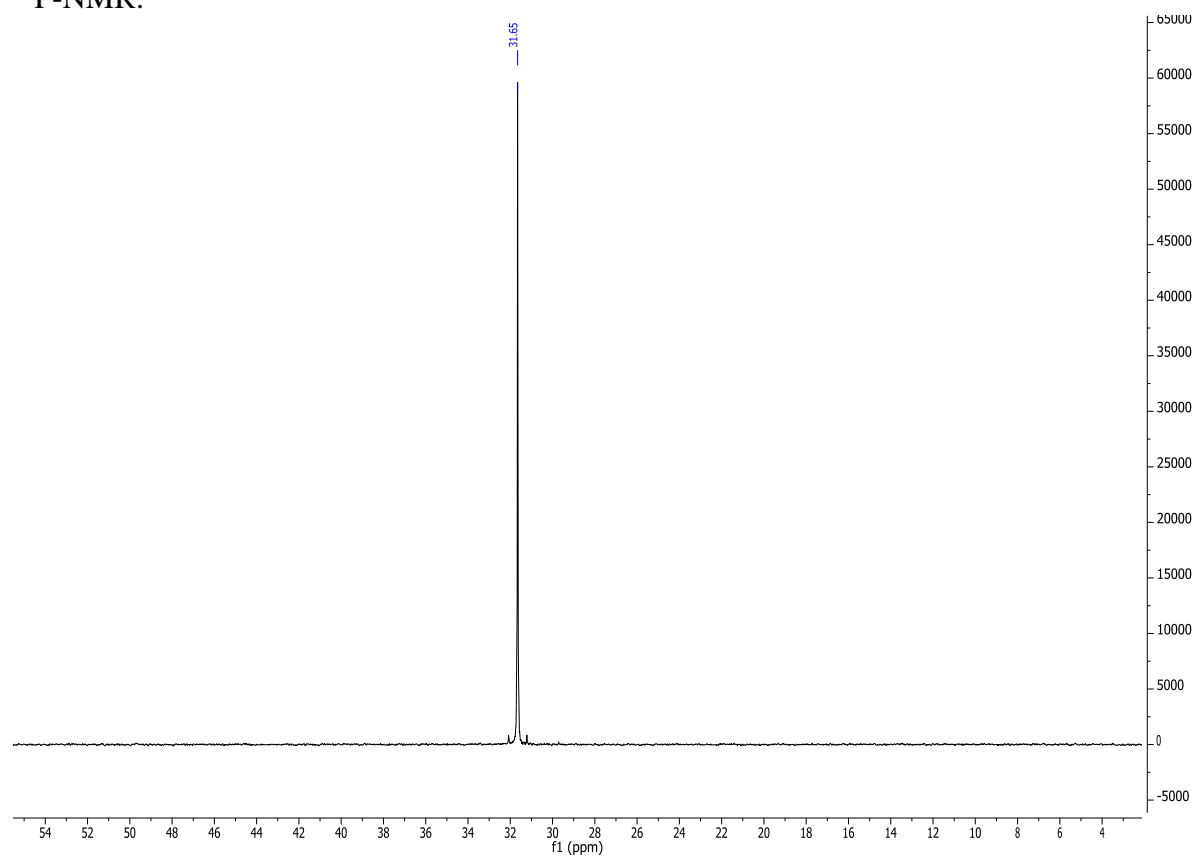

## HPLC analysis:

### Table 1, entry 1:

```
=====
Acq. Operator   :                               Seq. Line :    5
Acq. Instrument : LC 3                         Location  : Vial 12
Injection Date  : 5/6/2014 4:44:56 PM          Inj       :    1
                                                Inj Volume: 1.0 µl
Different Inj Volume from Sequence !      Actual Inj Volume : 0.2 µl
Acq. Method     : D:\HPCHEM\1\METHODS\FISCHER2.M
Last changed    : 5/6/2014 3:51:35 PM
                  (modified after loading)
Analysis Method : C:\CHEM32\2\METHODS\FISCHER.M
Last changed    : 9/2/2015 2:38:40 PM
                  (modified after loading)
Additional Info  : Peak(s) manually integrated
=====
```

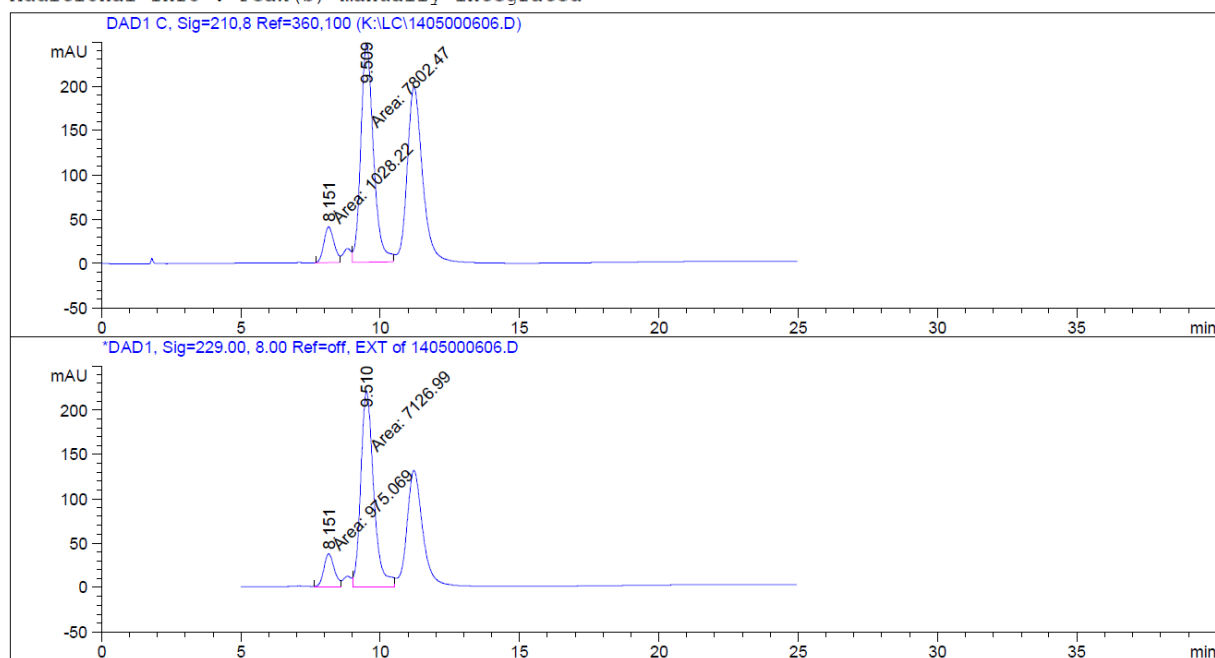

#### Area Percent Report

```
=====
Sorted By      :      Signal
Multiplier:    :      1.0000
Dilution:      :      1.0000
Use Multiplier & Dilution Factor with ISTDs
=====
```

Signal 1: DAD1 C, Sig=210,8 Ref=360,100

| Peak # | RetTime [min] | Type | Width [min] | Area [mAU*s] | Height [mAU] | Area %  |
|--------|---------------|------|-------------|--------------|--------------|---------|
| 1      | 8.151         | MF   | 0.4252      | 1028.22241   | 40.30477     | 11.6437 |
| 2      | 9.509         | FM   | 0.5300      | 7802.47461   | 245.36790    | 88.3563 |

Totals : 8830.69702 285.67267

Signal 2: DAD1, Sig=229.00, 8.00 Ref=off, EXT  
 Signal has been modified after loading from rawdata file!

| Peak<br># | RetTime<br>[min] | Type | Width<br>[min] | Area<br>[mAU*s] | Height<br>[mAU] | Area<br>% |
|-----------|------------------|------|----------------|-----------------|-----------------|-----------|
| 1         | 8.151            | MF   | 0.4363         | 975.06885       | 37.25163        | 12.0348   |
| 2         | 9.510            | MF   | 0.5392         | 7126.98779      | 220.29738       | 87.9652   |

Totals :                    8102.05664   257.54901



# Table 1, entry 2:

```
=====
Acq. Operator   :                               Seq. Line :    2
Acq. Instrument : LC 2                         Location  : Vial 12
Injection Date  : 5/15/2014 1:30:40 PM          Inj       :    1
                                                Inj Volume: 0.2 µl

Acq. Method     : C:\CHEM32\2\METHODS\FISCHER.M
Last changed    : 5/15/2014 11:46:45 AM
Analysis Method : C:\CHEM32\2\METHODS\FISCHER.M
Last changed    : 9/1/2015 12:09:29 PM
                  (modified after loading)
Additional Info  : Peak(s) manually integrated
=====
```

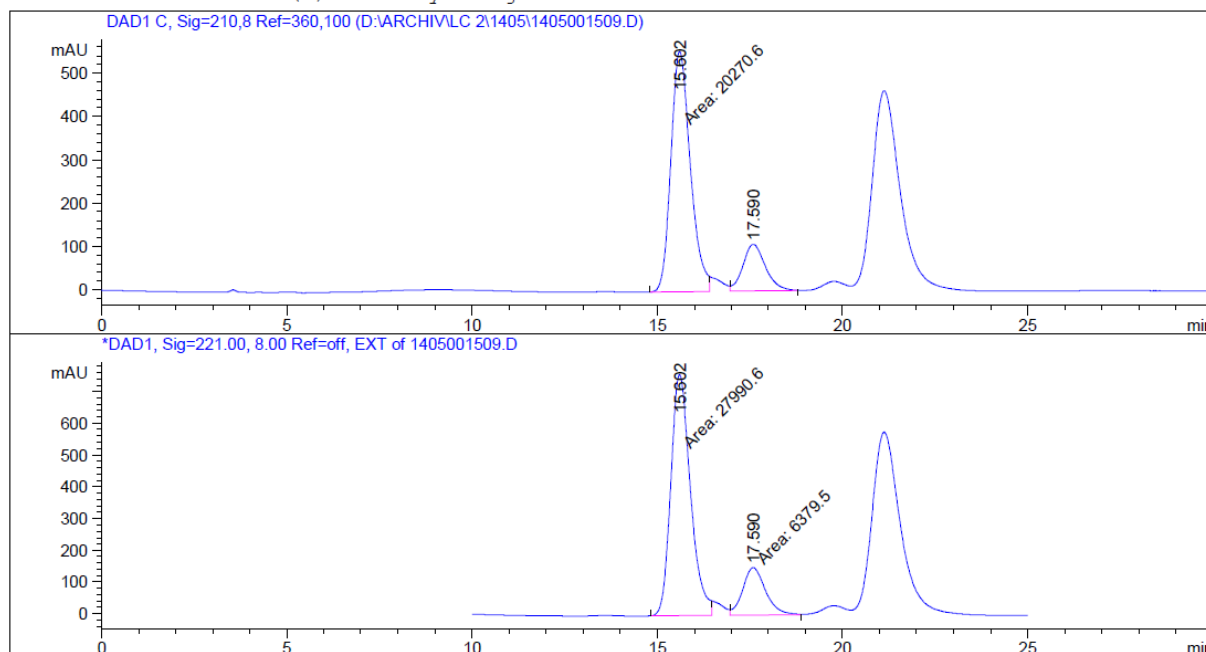

## Area Percent Report

```
=====
Sorted By      :      Signal
Multiplier:    :      1.0000
Dilution:      :      1.0000
Use Multiplier & Dilution Factor with ISTDs
=====
```

Signal 1: DAD1 C, Sig=210,8 Ref=360,100

| Peak # | RetTime [min] | Type | Width [min] | Area [mAU*s] | Height [mAU] | Area %  |
|--------|---------------|------|-------------|--------------|--------------|---------|
| 1      | 15.602        | MF   | 0.6093      | 2.02706e4    | 554.45905    | 81.6528 |
| 2      | 17.590        | VB   | 0.6398      | 4554.75391   | 107.61131    | 18.3472 |

Totals : 2.48253e4 662.07035  
Signal 2: DAD1, Sig=221.00, 8.00 Ref=off, EXT  
Signal has been modified after loading from rawdata file!

| Peak # | RetTime [min] | Type | Width [min] | Area [mAU*s] | Height [mAU] | Area %  |
|--------|---------------|------|-------------|--------------|--------------|---------|
| 1      | 15.602        | MF   | 0.6151      | 2.79906e4    | 758.38672    | 81.4388 |
| 2      | 17.590        | FM   | 0.7128      | 6379.50195   | 149.16548    | 18.5612 |

Totals : 3.43701e4 907.55220

### Table 1, entry 3:

Acq. Operator : Seq. Line : 1  
 Acq. Instrument : LC 2 Location : Vial 3  
 Injection Date : 6/2/2014 11:07:21 AM Inj : 1  
 Inj Volume : 0.2 µl  
 Acq. Method : C:\CHEM32\2\METHODS\FISCHER.M  
 Last changed : 6/2/2014 11:06:28 AM  
 Analysis Method : C:\CHEM32\2\METHODS\FISCHER.M  
 Last changed : 6/3/2014 2:06:26 PM  
 (modified after loading)  
 Method Info : Cellulose 2, Heptan/EtOH 99:1, Fluß: 1,0 ml/min

Additional Info : Peak(s) manually integrated

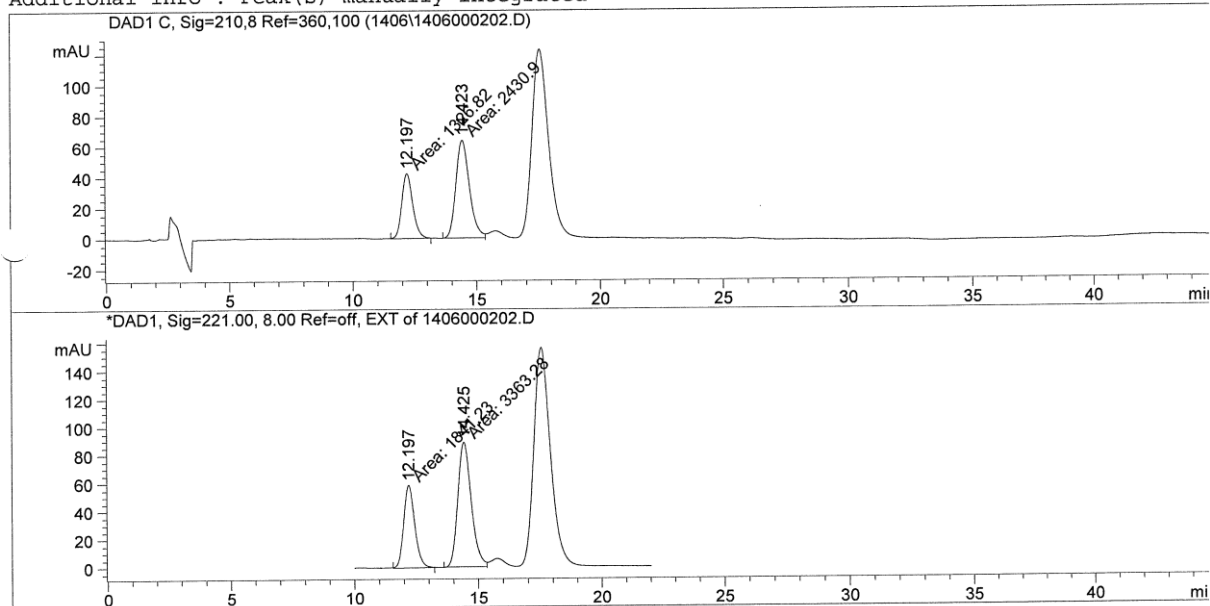

#### Area Percent Report

Sorted By : Signal  
 Multiplier: : 1.0000  
 Dilution: : 1.0000  
 Use Multiplier & Dilution Factor with ISTDs

Signal 1: DAD1 C, Sig=210,8 Ref=360,100

| Peak # | RetTime [min] | Type | Width [min] | Area [mAU*s] | Height [mAU] | Area %  |
|--------|---------------|------|-------------|--------------|--------------|---------|
| 1      | 12.197        | MM   | 0.5215      | 1326.81787   | 42.40629     | 35.0183 |
| 2      | 14.423        | MM   | 0.6341      | 2430.90137   | 63.89017     | 64.9817 |

Totals : 3757.71924 106.29646

Signal 2: DAD1, Sig=221.00, 8.00 Ref=off, EXT

Signal has been modified after loading from rawdata file!

| Peak # | RetTime [min] | Type | Width [min] | Area [mAU*s] | Height [mAU] | Area %  |
|--------|---------------|------|-------------|--------------|--------------|---------|
| 1      | 12.197        | MM   | 0.5217      | 1841.22791   | 58.82172     | 35.0345 |
| 2      | 14.425        | MM   | 0.6314      | 3363.28052   | 88.77180     | 64.9655 |

Totals : 5204.50842 147.59353

# Table 1, entry 4:

```
=====
Acq. Operator   :                               Seq. Line :    3
Acq. Instrument : LC 2                         Location  : Vial 3
Injection Date  : 6/3/2014 11:03:48 AM          Inj       :    1
                                           Inj Volume: 0.2 µl

Acq. Method     : C:\CHEM32\2\METHODS\FISCHER.M
Last changed    : 6/3/2014 9:33:19 AM
                  (modified after loading)
Analysis Method : C:\CHEM32\2\METHODS\FISCHER.M
Last changed    : 9/1/2015 12:09:29 PM
                  (modified after loading)
Additional Info  : Peak(s) manually integrated
```

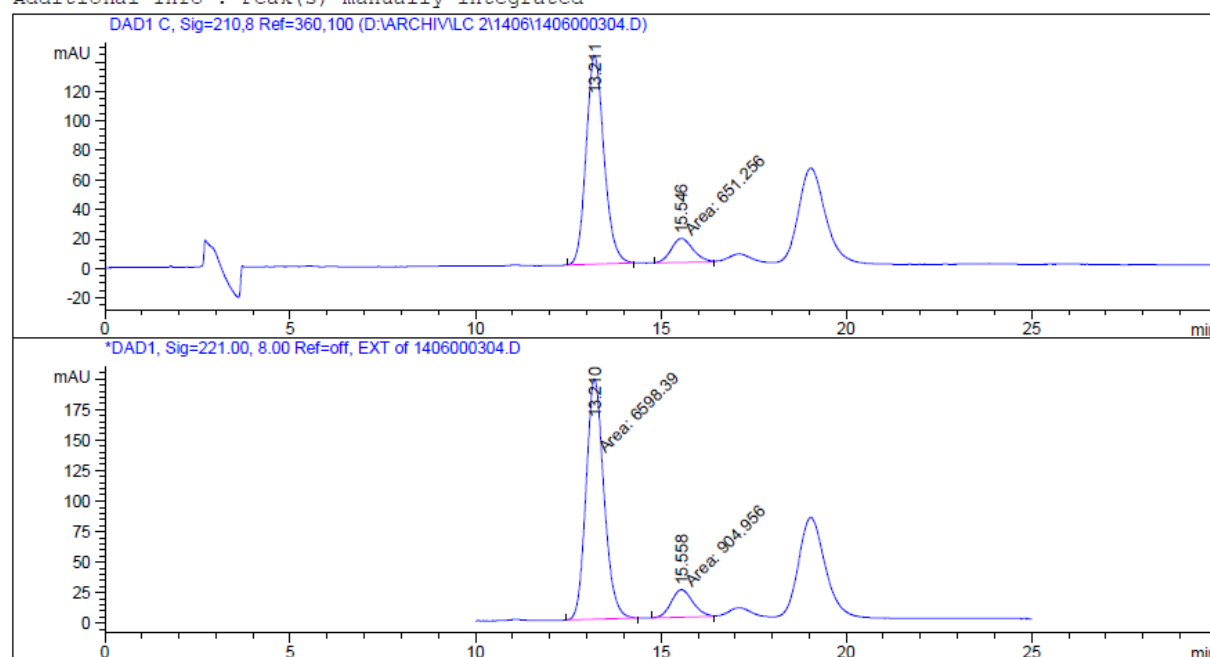

## Area Percent Report

```
Sorted By      :      Signal
Multiplier:    :      1.0000
Dilution:      :      1.0000
Use Multiplier & Dilution Factor with ISTDs
```

Signal 1: DAD1 C, Sig=210,8 Ref=360,100

| Peak # | RetTime [min] | Type | Width [min] | Area [mAU*s] | Height [mAU] | Area %  |
|--------|---------------|------|-------------|--------------|--------------|---------|
| 1      | 13.211        | BB   | 0.5181      | 4754.74268   | 141.47903    | 87.9531 |
| 2      | 15.546        | MM   | 0.6724      | 651.25568    | 16.14193     | 12.0469 |

Totals : 5405.99835 157.62096  
Signal 2: DAD1, Sig=221.00, 8.00 Ref=off, EXT  
Signal has been modified after loading from rawdata file!

| Peak # | RetTime [min] | Type | Width [min] | Area [mAU*s] | Height [mAU] | Area %  |
|--------|---------------|------|-------------|--------------|--------------|---------|
| 1      | 13.210        | MM   | 0.5593      | 6598.39209   | 196.61552    | 87.9393 |
| 2      | 15.558        | MM   | 0.6709      | 904.95636    | 22.48225     | 12.0607 |

Totals : 7503.34845 219.09777

# **Table 1, entry 5:**

```
=====
Acq. Operator   :                               Seq. Line :    4
Acq. Instrument : LC 2                         Location  : Vial 4
Injection Date  : 6/3/2014 12:05:58 PM          Inj       :    1
                                           Inj Volume: 0.2 µl

Acq. Method     : C:\CHEM32\2\METHODS\FISCHER.M
Last changed    : 6/3/2014 9:33:19 AM
                  (modified after loading)
Analysis Method : C:\CHEM32\2\METHODS\FISCHER.M
Last changed    : 9/1/2015 12:09:29 PM
                  (modified after loading)
Additional Info  : Peak(s) manually integrated
=====
```

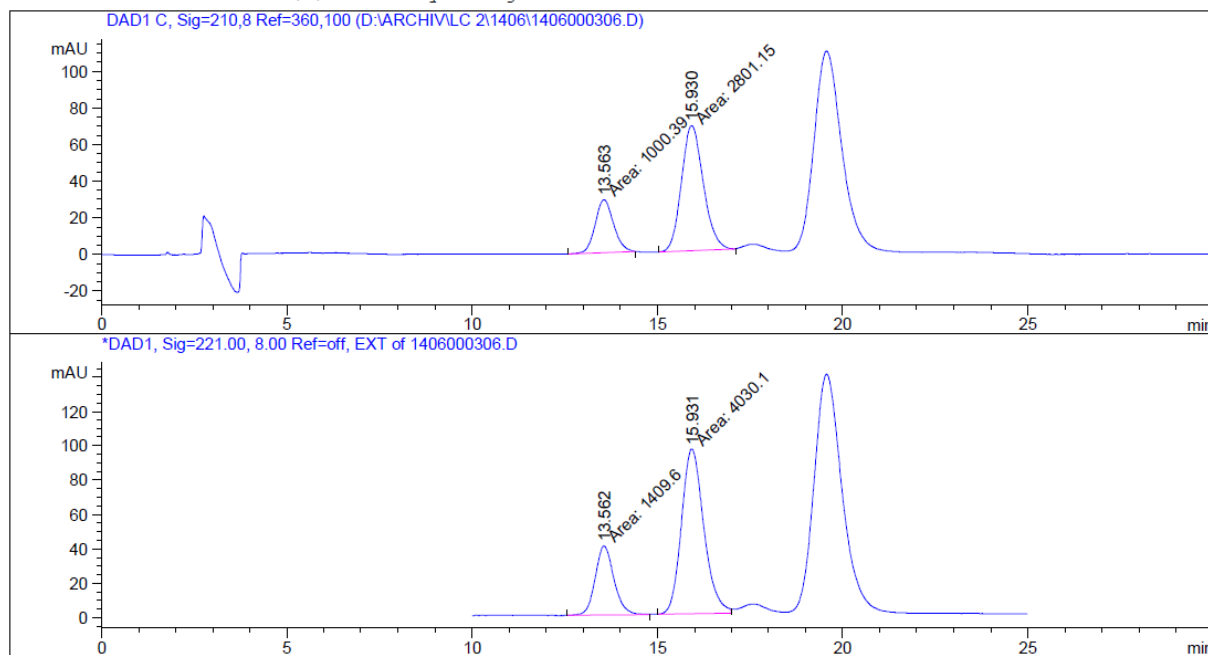

## Area Percent Report

```
Sorted By      :      Signal
Multiplier:    :      1.0000
Dilution:      :      1.0000
Use Multiplier & Dilution Factor with ISTDs
```

Signal 1: DAD1 C, Sig=210,8 Ref=360,100

| Peak # | RetTime [min] | Type | Width [min] | Area [mAU*s] | Height [mAU] | Area %  |
|--------|---------------|------|-------------|--------------|--------------|---------|
| 1      | 13.563        | MM   | 0.5763      | 1000.38519   | 28.93310     | 26.3153 |
| 2      | 15.930        | MM   | 0.6847      | 2801.14600   | 68.18134     | 73.6847 |

Totals : 3801.53119 97.11443  
 Signal 2: DAD1, Sig=221.00, 8.00 Ref=off, EXT  
 Signal has been modified after loading from rawdata file!

| Peak # | RetTime [min] | Type | Width [min] | Area [mAU*s] | Height [mAU] | Area %  |
|--------|---------------|------|-------------|--------------|--------------|---------|
| 1      | 13.562        | MM   | 0.5861      | 1409.60083   | 40.08610     | 25.9132 |
| 2      | 15.931        | MM   | 0.7005      | 4030.09644   | 95.88995     | 74.0868 |

Totals : 5439.69727 135.97605

# **Table 1, entry 6:**

```
=====
Acq. Operator   :                               Seq. Line :    5
Acq. Instrument : LC 2                         Location  : Vial 5
Injection Date  : 6/3/2014 1:08:09 PM           Inj       :    1
                                           Inj Volume: 0.2 µl

Acq. Method     : C:\CHEM32\2\METHODS\FISCHER.M
Last changed    : 6/3/2014 9:33:19 AM
                  (modified after loading)
Analysis Method : C:\CHEM32\2\METHODS\FISCHER.M
Last changed    : 9/1/2015 12:09:29 PM
                  (modified after loading)
Additional Info  : Peak(s) manually integrated
=====
```

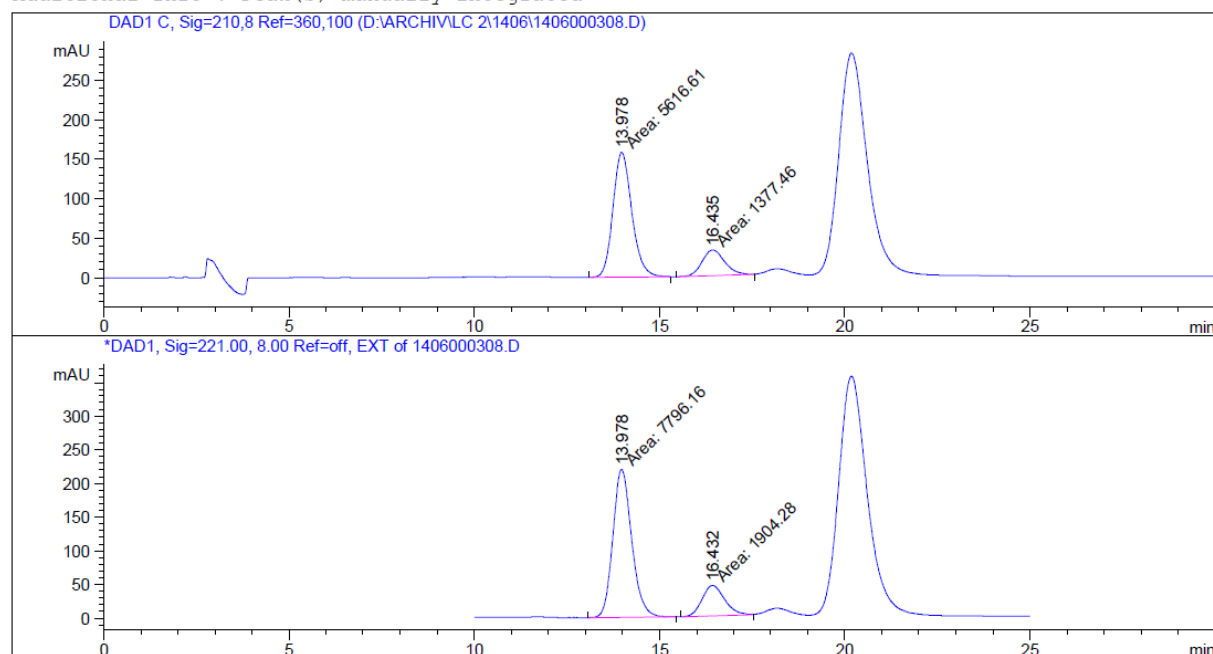

## Area Percent Report

```
Sorted By      :      Signal
Multiplier:    :      1.0000
Dilution:      :      1.0000
Use Multiplier & Dilution Factor with ISTDs
```

Signal 1: DAD1 C, Sig=210,8 Ref=360,100

| Peak # | RetTime [min] | Type | Width [min] | Area [mAU*s] | Height [mAU] | Area %  |
|--------|---------------|------|-------------|--------------|--------------|---------|
| 1      | 13.978        | MM   | 0.5916      | 5616.60547   | 158.23508    | 80.3053 |
| 2      | 16.435        | MM   | 0.7045      | 1377.46033   | 32.58535     | 19.6947 |

Totals : 6994.06580 190.82043  
Signal 2: DAD1, Sig=221.00, 8.00 Ref=off, EXT  
Signal has been modified after loading from rawdata file!

| Peak # | RetTime [min] | Type | Width [min] | Area [mAU*s] | Height [mAU] | Area %  |
|--------|---------------|------|-------------|--------------|--------------|---------|
| 1      | 13.978        | MM   | 0.5914      | 7796.16260   | 219.71109    | 80.3691 |
| 2      | 16.432        | MM   | 0.7040      | 1904.28052   | 45.08112     | 19.6309 |

Totals : 9700.44312 264.79221

# **Table 1, entry 7:**

```
=====
Acq. Operator   :                               Seq. Line :    6
Acq. Instrument : LC 2                         Location  : Vial 6
Injection Date  : 6/3/2014 2:10:21 PM          Inj       :    1
                                           Inj Volume: 0.2 µl
```

```
Acq. Method     : C:\CHEM32\2\METHODS\FISCHER.M
Last changed    : 6/3/2014 9:33:19 AM
                  (modified after loading)
```

```
Analysis Method : C:\CHEM32\2\METHODS\FISCHER.M
Last changed    : 9/1/2015 12:09:29 PM
                  (modified after loading)
```

Additional Info : Peak(s) manually integrated

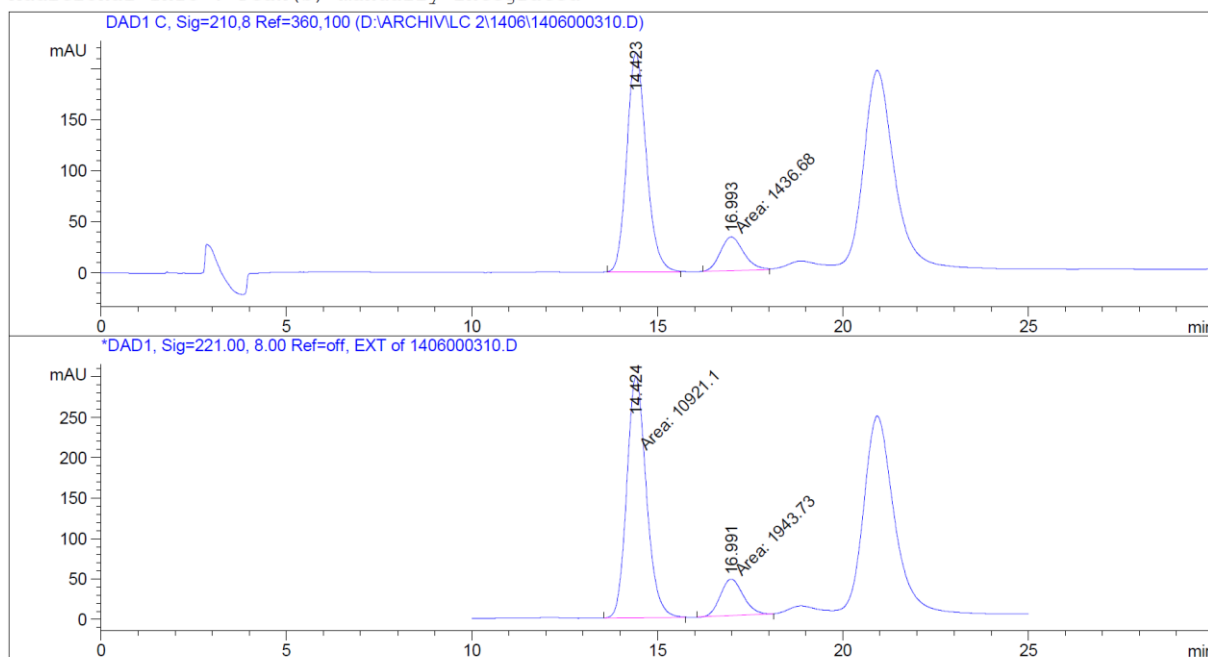

## Area Percent Report

```
=====
Sorted By      :      Signal
Multiplier:    :      1.0000
Dilution:      :      1.0000
Use Multiplier & Dilution Factor with ISTDs
```

Signal 1: DAD1 C, Sig=210,8 Ref=360,100

| Peak # | RetTime [min] | Type | Width [min] | Area [mAU*s] | Height [mAU] | Area %  |
|--------|---------------|------|-------------|--------------|--------------|---------|
| 1      | 14.423        | BB   | 0.5615      | 7831.39160   | 214.72615    | 84.4987 |
| 2      | 16.993        | MM   | 0.7283      | 1436.67542   | 32.87614     | 15.5013 |

```
Totals :                      9268.06702  247.60229
Signal 2: DAD1, Sig=221.00, 8.00 Ref=off, EXT
Signal has been modified after loading from rawdata file!
```

| Peak # | RetTime [min] | Type | Width [min] | Area [mAU*s] | Height [mAU] | Area %  |
|--------|---------------|------|-------------|--------------|--------------|---------|
| 1      | 14.424        | MM   | 0.6100      | 1.09211e4    | 298.38892    | 84.8912 |
| 2      | 16.991        | MM   | 0.7155      | 1943.72559   | 45.27864     | 15.1088 |

```
Totals :                      1.28649e4  343.66755
```

# **Table 1, entry 8:**

```
=====
Acq. Operator   :                               Seq. Line :    7
Acq. Instrument : LC 2                         Location  : Vial 7
Injection Date  : 6/3/2014 3:12:33 PM          Inj       :    1
                                           Inj Volume: 0.2 µl
```

```
Acq. Method     : C:\CHEM32\2\METHODS\FISCHER.M
Last changed    : 6/3/2014 9:33:19 AM
                  (modified after loading)
```

```
Analysis Method : C:\CHEM32\2\METHODS\FISCHER.M
Last changed    : 9/1/2015 12:09:29 PM
                  (modified after loading)
```

Additional Info : Peak(s) manually integrated

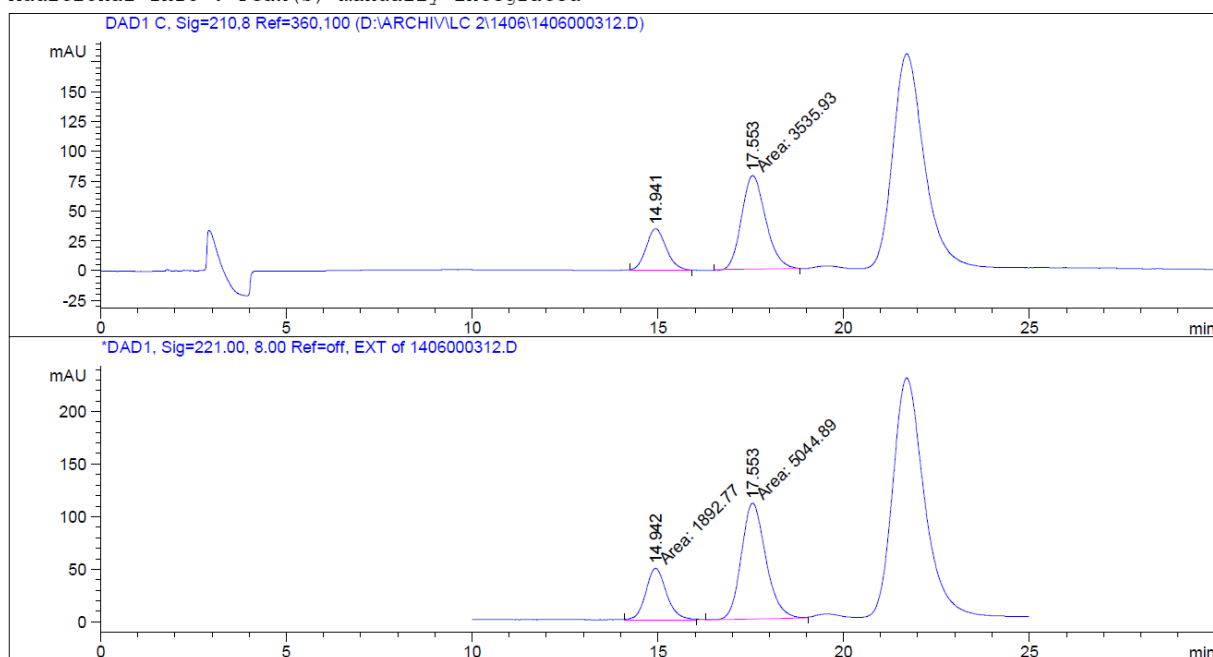

## Area Percent Report

```
Sorted By      :      Signal
Multiplier:    :      1.0000
Dilution:      :      1.0000
Use Multiplier & Dilution Factor with ISTDs
```

Signal 1: DAD1 C, Sig=210,8 Ref=360,100

| Peak # | RetTime [min] | Type | Width [min] | Area [mAU*s] | Height [mAU] | Area %  |
|--------|---------------|------|-------------|--------------|--------------|---------|
| 1      | 14.941        | BB   | 0.5638      | 1304.23267   | 34.75591     | 26.9460 |
| 2      | 17.553        | MM   | 0.7528      | 3535.93408   | 78.28011     | 73.0540 |

```
Totals :                      4840.16675  113.03602
Signal 2: DAD1, Sig=221.00, 8.00 Ref=off, EXT
Signal has been modified after loading from rawdata file!
```

| Peak # | RetTime [min] | Type | Width [min] | Area [mAU*s] | Height [mAU] | Area %  |
|--------|---------------|------|-------------|--------------|--------------|---------|
| 1      | 14.942        | MM   | 0.6453      | 1892.77344   | 48.88490     | 27.2826 |
| 2      | 17.553        | MM   | 0.7646      | 5044.89404   | 109.96222    | 72.7174 |

```
Totals :                      6937.66748  158.84712
```

# Table 2, entry 1:

```
=====
Acq. Operator   :                               Seq. Line :    2
Acq. Instrument : LC 2                         Location  : Vial 2
Injection Date  : 12/18/2014 11:11:30 AM        Inj       :    1
                                           Inj Volume: 0.2 µl
```

```
Acq. Method     : C:\CHEM32\2\METHODS\FISCHER.M
Last changed    : 12/18/2014 9:37:12 AM
Analysis Method : C:\CHEM32\2\METHODS\DEF_LC.M
Last changed    : 8/26/2015 1:42:29 PM
                  (modified after loading)
```

Additional Info : Peak(s) manually integrated

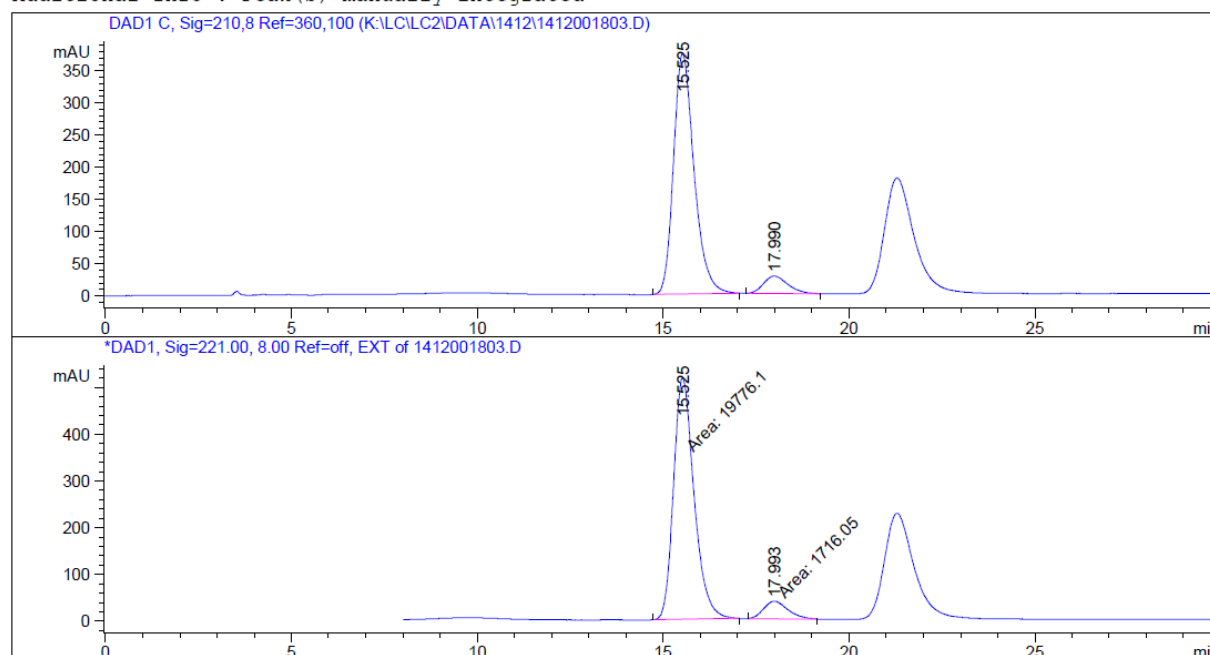

## Area Percent Report

```
Sorted By      :      Signal
Multiplier:    :      1.0000
Dilution:      :      1.0000
Use Multiplier & Dilution Factor with ISTDs
```

Signal 1: DAD1 C, Sig=210,8 Ref=360,100

| Peak # | RetTime [min] | Type | Width [min] | Area [mAU*s] | Height [mAU] | Area %  |
|--------|---------------|------|-------------|--------------|--------------|---------|
| 1      | 15.525        | BB   | 0.5862      | 1.43760e4    | 374.22119    | 92.0729 |
| 2      | 17.990        | BB   | 0.6101      | 1237.71704   | 27.13681     | 7.9271  |

```
Totals :                               1.56137e4  401.35800
Signal 2: DAD1, Sig=221.00, 8.00 Ref=off, EXT
Signal has been modified after loading from rawdata file!
```

| Peak # | RetTime [min] | Type | Width [min] | Area [mAU*s] | Height [mAU] | Area %  |
|--------|---------------|------|-------------|--------------|--------------|---------|
| 1      | 15.525        | MM   | 0.6396      | 1.97761e4    | 515.30829    | 92.0155 |
| 2      | 17.993        | MM   | 0.7633      | 1716.04749   | 37.47045     | 7.9845  |

```
Totals :                               2.14921e4  552.77874
```



## Table 2, entry 2:

```
=====
Acq. Operator   :                               Seq. Line :    1
Acq. Instrument : LC 2                         Location  : Vial 2
Injection Date  : 1/9/2015 2:33:46 PM          Inj       :    2
                                           Inj Volume: 0.2 µl
=====
```

```
Acq. Method     : C:\CHEM32\2\METHODS\FISCHER.M
Last changed    : 1/9/2015 9:46:40 AM
Analysis Method : C:\CHEM32\2\METHODS\DEF_LC.M
Last changed    : 8/26/2015 1:42:29 PM
                  (modified after loading)
```

Additional Info : Peak(s) manually integrated

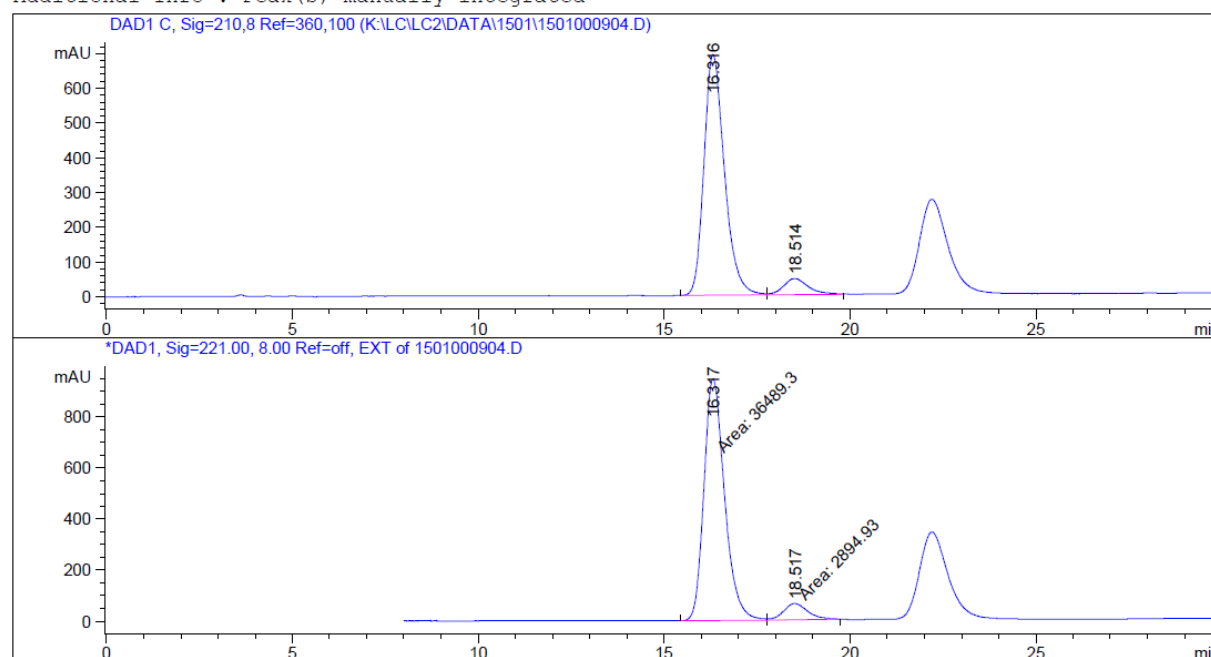

### Area Percent Report

```
=====
Sorted By      :      Signal
Multiplier:    :      1.0000
Dilution:      :      1.0000
Use Multiplier & Dilution Factor with ISTDs
=====
```

Signal 1: DAD1 C, Sig=210,8 Ref=360,100

| Peak # | RetTime [min] | Type | Width [min] | Area [mAU*s] | Height [mAU] | Area %  |
|--------|---------------|------|-------------|--------------|--------------|---------|
| 1      | 16.316        | BB   | 0.5829      | 2.65403e4    | 692.89911    | 92.6167 |
| 2      | 18.514        | BB   | 0.6419      | 2115.77148   | 45.88992     | 7.3833  |

Totals : 2.86561e4 738.78903  
Signal 2: DAD1, Sig=221.00, 8.00 Ref=off, EXT  
Signal has been modified after loading from rawdata file!

| Peak # | RetTime [min] | Type | Width [min] | Area [mAU*s] | Height [mAU] | Area %  |
|--------|---------------|------|-------------|--------------|--------------|---------|
| 1      | 16.317        | MF   | 0.6425      | 3.64893e4    | 946.61737    | 92.6495 |
| 2      | 18.517        | FM   | 0.7591      | 2894.92773   | 63.55793     | 7.3505  |

Totals : 3.93842e4 1010.17530

# **Table 3, entry 1:**

```
=====
Acq. Operator   :                               Seq. Line :    2
Acq. Instrument : LC 2                         Location  : Vial 2
Injection Date  : 4/22/2015 1:49:20 PM          Inj       :    1
                                           Inj Volume: 0.2 µl
```

```
Acq. Method     : C:\CHEM32\2\METHODS\FISCHER.M
Last changed    : 4/21/2015 10:35:06 AM
Analysis Method : C:\CHEM32\2\METHODS\DEF_LC.M
Last changed    : 8/26/2015 1:42:29 PM
                  (modified after loading)
```

Additional Info : Peak(s) manually integrated

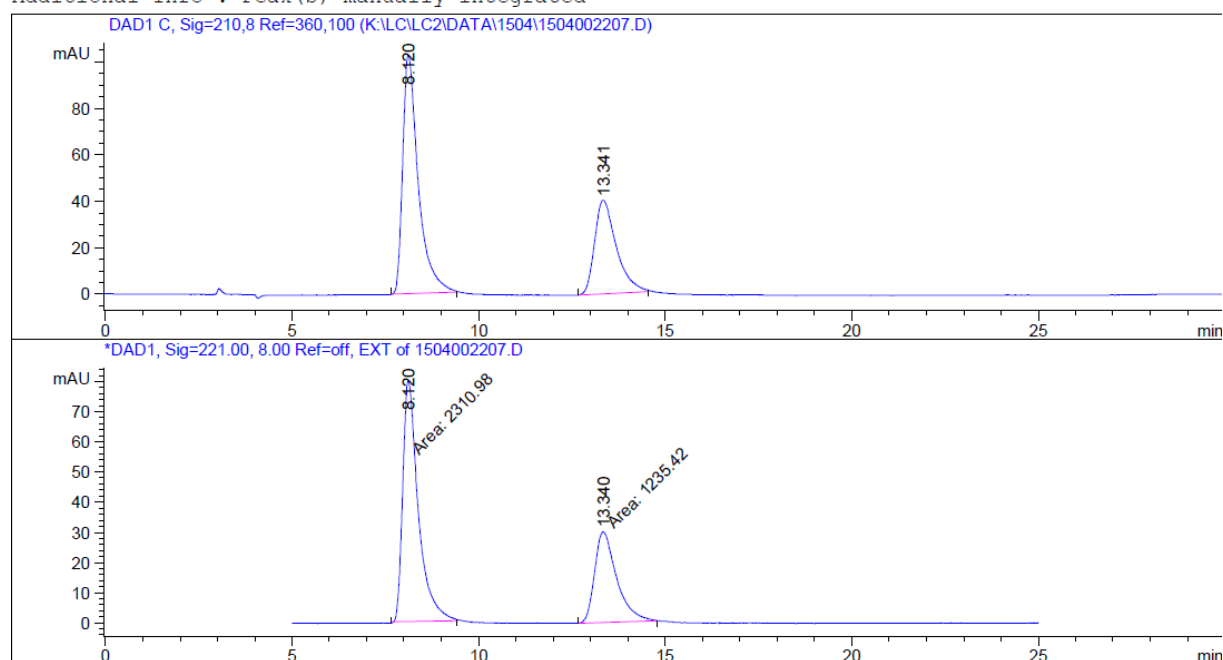

## Area Percent Report

```
Sorted By      :      Signal
Multiplier:    :      1.0000
Dilution:      :      1.0000
Use Multiplier & Dilution Factor with ISTDs
```

Signal 1: DAD1 C, Sig=210,8 Ref=360,100

| Peak # | RetTime [min] | Type | Width [min] | Area [mAU*s] | Height [mAU] | Area %  |
|--------|---------------|------|-------------|--------------|--------------|---------|
| 1      | 8.120         | BB   | 0.4282      | 2979.22900   | 102.77245    | 64.7460 |
| 2      | 13.341        | BB   | 0.5885      | 1622.18018   | 40.22208     | 35.2540 |

```
Totals :                               4601.40918  142.99452
Signal 2: DAD1, Sig=221.00, 8.00 Ref=off, EXT
Signal has been modified after loading from rawdata file!
```

| Peak # | RetTime [min] | Type | Width [min] | Area [mAU*s] | Height [mAU] | Area %  |
|--------|---------------|------|-------------|--------------|--------------|---------|
| 1      | 8.120         | MM   | 0.4811      | 2310.97998   | 80.05103     | 65.1642 |
| 2      | 13.340        | MM   | 0.6852      | 1235.41675   | 30.05008     | 34.8358 |

```
Totals :                               3546.39673  110.10111
```

# Table 3, entry 2:

```
=====
Acq. Operator   :                               Seq. Line :    3
Acq. Instrument : LC 2                         Location  : Vial 3
Injection Date  : 5/11/2015 5:32:43 PM          Inj       :    1
                                           Inj Volume: 0.2 µl
=====
```

```
Acq. Method     : C:\CHEM32\2\METHODS\FISCHER.M
Last changed    : 5/11/2015 2:19:18 PM
Analysis Method : C:\CHEM32\2\METHODS\FISCHER.M
Last changed    : 9/2/2015 11:47:09 AM
                (modified after loading)
```

Additional Info : Peak(s) manually integrated

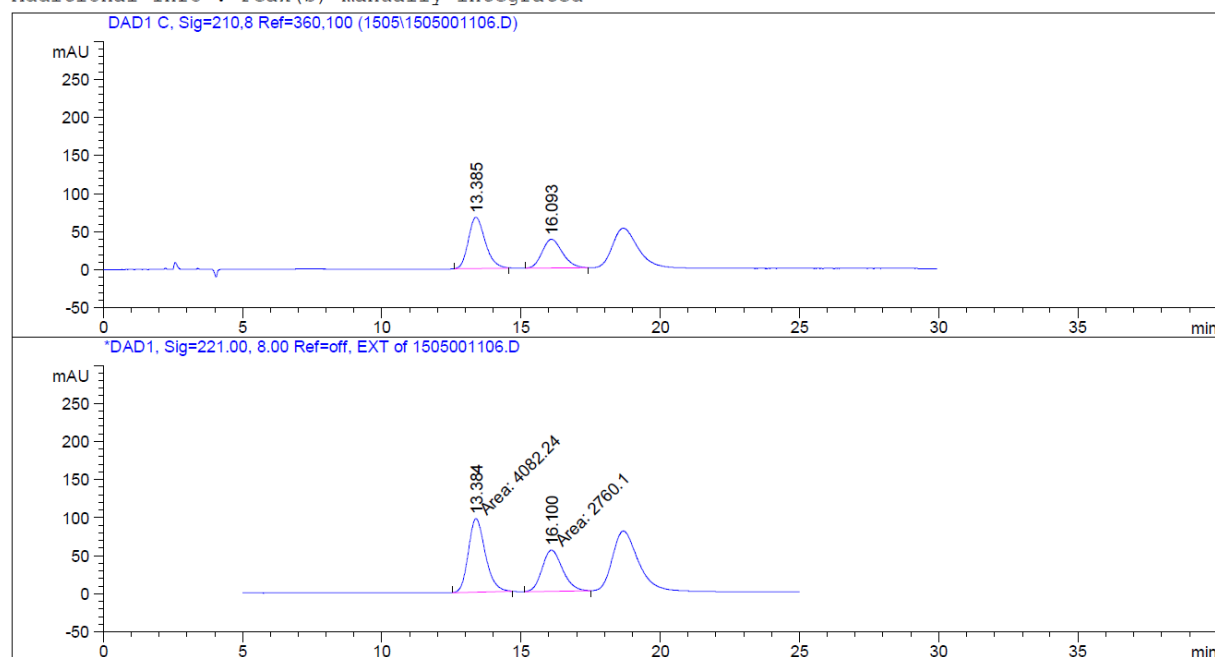

## Area Percent Report

```
=====
Sorted By      :      Signal
Multiplier:    :      1.0000
Dilution:      :      1.0000
Use Multiplier & Dilution Factor with ISTDs
=====
```

Signal 1: DAD1 C, Sig=210,8 Ref=360,100

| Peak # | RetTime [min] | Type | Width [min] | Area [mAU*s] | Height [mAU] | Area %  |
|--------|---------------|------|-------------|--------------|--------------|---------|
| 1      | 13.385        | BB   | 0.6407      | 2841.62915   | 67.56503     | 59.6591 |
| 2      | 16.093        | BB   | 0.7700      | 1921.48242   | 37.86501     | 40.3409 |

Totals : 4763.11157 105.43003  
Signal 2: DAD1, Sig=221.00, 8.00 Ref=off, EXT  
Signal has been modified after loading from rawdata file!

| Peak # | RetTime [min] | Type | Width [min] | Area [mAU*s] | Height [mAU] | Area %  |
|--------|---------------|------|-------------|--------------|--------------|---------|
| 1      | 13.384        | MM   | 0.7037      | 4082.24390   | 96.68655     | 59.6615 |
| 2      | 16.100        | MM   | 0.8484      | 2760.09644   | 54.22163     | 40.3385 |

Totals : 6842.34033 150.90818

# Table 3, entry 4:

```
=====
Acq. Operator   :                               Seq. Line :    2
Acq. Instrument : LC 2                         Location  : Vial 53
Injection Date  : 9/11/2015 10:00:32 AM        Inj       :    1
                                           Inj Volume: 1.0 µl
Different Inj Volume from Sequence !      Actual Inj Volume: 0.2 µl
Acq. Method     : C:\CHEM32\2\METHODS\FISCHER.M
Last changed    : 9/10/2015 4:09:16 PM
Analysis Method : C:\CHEM32\2\METHODS\FISCHER.M
Last changed    : 9/11/2015 10:52:41 AM
                  (modified after loading)
Method Info     : Reprosil, Heptan/EtOH 95:5, Fluß: 1ml/min
=====
```

Additional Info : Peak(s) manually integrated

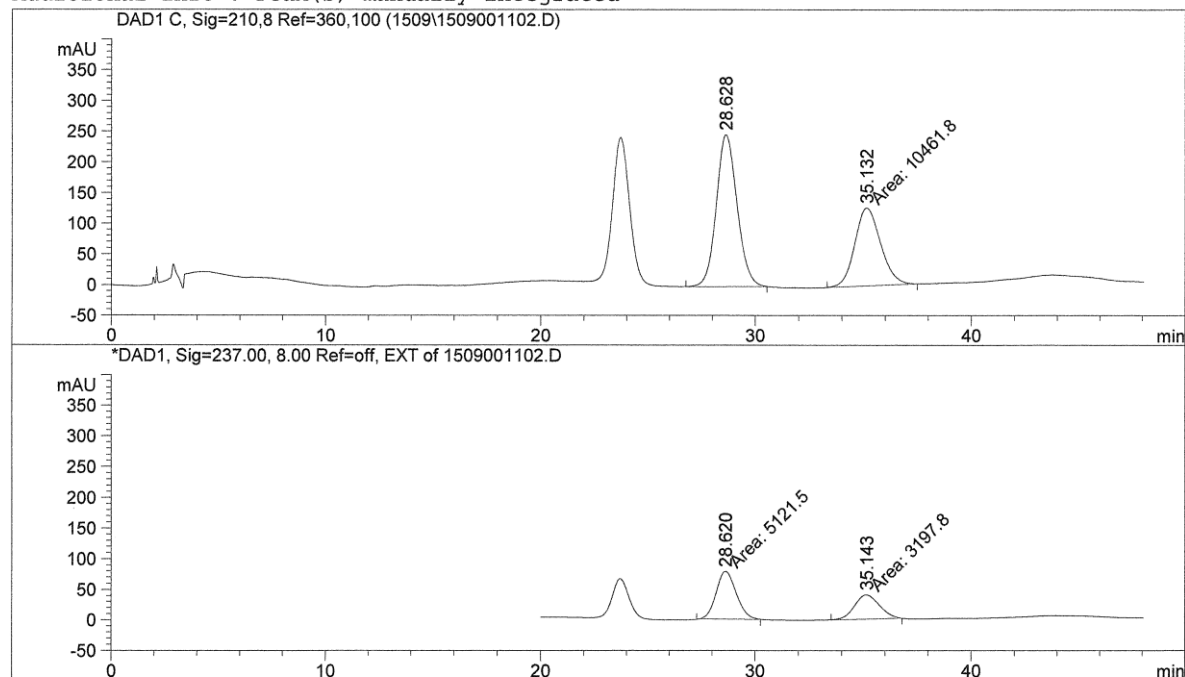

## Area Percent Report

```
=====
Sorted By      :      Signal
Multiplier:    :      1.0000
Dilution:      :      1.0000
Use Multiplier & Dilution Factor with ISTDs
=====
```

Signal 1: DAD1 C, Sig=210,8 Ref=360,100

| Peak # | RetTime [min] | Type | Width [min] | Area [mAU*s] | Height [mAU] | Area % |
|--------|---------------|------|-------------|--------------|--------------|--------|
| 1      | 28.628        | VB   | 0.9427      | 1.66227e4    | 247.13280    | 61.76  |
| 2      | 35.132        | MM   | 1.3742      | 1.04618e4    | 126.87939    | 38.24  |

Totals : 2.70846e4 374.01218  
Signal 2: DAD1, Sig=237.00, 8.00 Ref=off, EXT  
Signal has been modified after loading from rawdata file!

| Peak # | RetTime [min] | Type | Width [min] | Area [mAU*s] | Height [mAU] | Area % |
|--------|---------------|------|-------------|--------------|--------------|--------|
| 1      | 28.620        | MM   | 1.0881      | 5121.49854   | 78.44955     | 61.40  |
| 2      | 35.143        | MM   | 1.3271      | 3197.80444   | 40.16091     | 38.60  |

Totals : 8319.30298 118.61047

# Table 3, entry 6:

```
=====
Acq. Operator   :                               Seq. Line :    2
Acq. Instrument : LC 2                         Location  : Vial 2
Injection Date  : 4/17/2015 4:46:33 PM          Inj       :    2
                                           Inj Volume: 0.2 µl
```

```
Acq. Method     : C:\CHEM32\2\METHODS\FISCHER.M
Last changed    : 4/17/2015 12:41:22 PM
Analysis Method : C:\CHEM32\2\METHODS\DEF_LC.M
Last changed    : 8/26/2015 1:42:29 PM
                  (modified after loading)
```

Additional Info : Peak(s) manually integrated

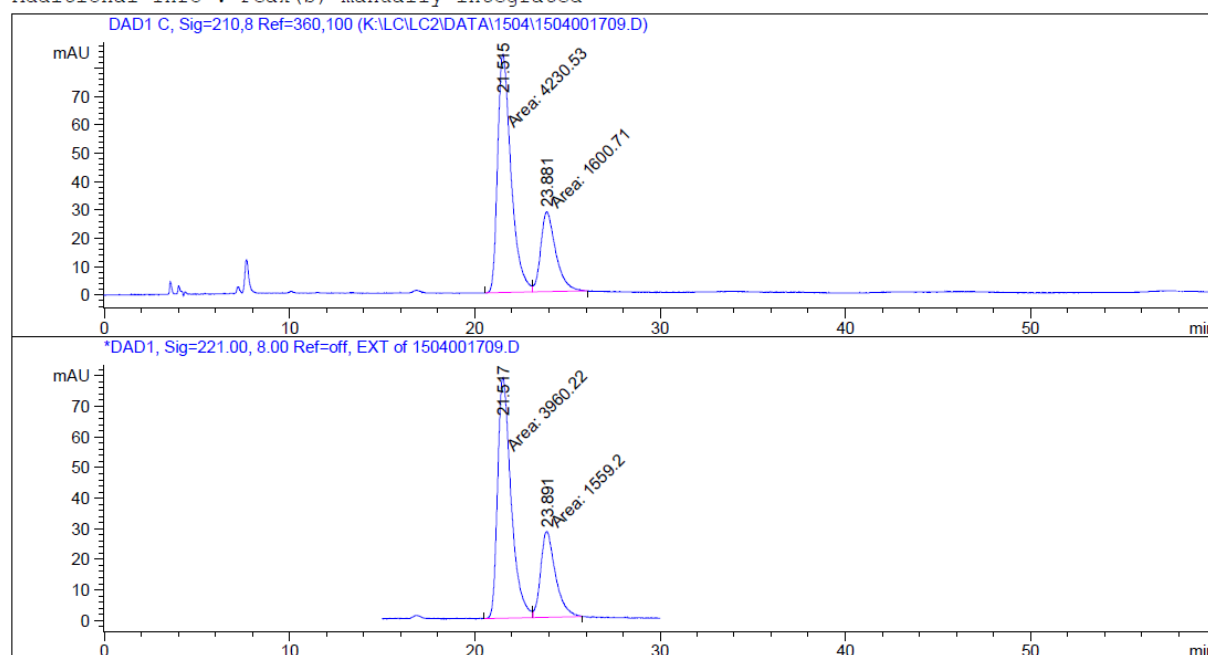

## Area Percent Report

```
Sorted By      :      Signal
Multiplier:    :      1.0000
Dilution:      :      1.0000
Use Multiplier & Dilution Factor with ISTDs
```

Signal 1: DAD1 C, Sig=210,8 Ref=360,100

| Peak # | RetTime [min] | Type | Width [min] | Area [mAU*s] | Height [mAU] | Area %  |
|--------|---------------|------|-------------|--------------|--------------|---------|
| 1      | 21.515        | MF   | 0.8394      | 4230.52930   | 83.99963     | 72.5494 |
| 2      | 23.881        | FM   | 0.9464      | 1600.71033   | 28.18929     | 27.4506 |

```
Totals :                               5831.23962 112.18892
Signal 2: DAD1, Sig=221.00, 8.00 Ref=off, EXT
Signal has been modified after loading from rawdata file!
```

| Peak # | RetTime [min] | Type | Width [min] | Area [mAU*s] | Height [mAU] | Area %  |
|--------|---------------|------|-------------|--------------|--------------|---------|
| 1      | 21.517        | MF   | 0.8418      | 3960.22412   | 78.40485     | 71.7507 |
| 2      | 23.891        | FM   | 0.9286      | 1559.19873   | 27.98620     | 28.2493 |

```
Totals :                               5519.42285 106.39105
```

# **Table 3, entry 7:**

```
=====
Acq. Operator   :                               Seq. Line :    2
Acq. Instrument : LC 2                         Location  : Vial 2
Injection Date  : 4/21/2015 12:08:26 PM         Inj       :    1
                                           Inj Volume: 0.2 µl
```

```
Acq. Method     : C:\CHEM32\2\METHODS\FISCHER.M
Last changed    : 4/21/2015 11:01:55 AM
                  (modified after loading)
```

```
Analysis Method : C:\CHEM32\2\METHODS\DEF_LC.M
Last changed    : 8/26/2015 1:42:29 PM
                  (modified after loading)
```

Additional Info : Peak(s) manually integrated

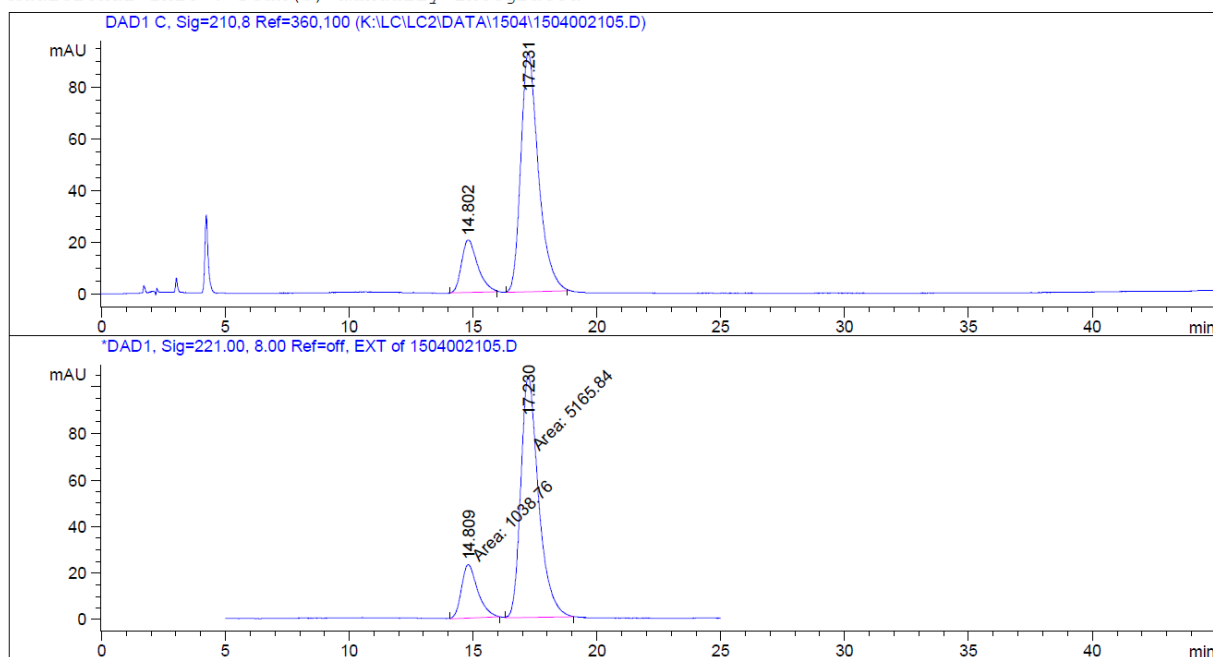

## Area Percent Report

```
Sorted By      :      Signal
Multiplier:    :      1.0000
Dilution:      :      1.0000
Use Multiplier & Dilution Factor with ISTDs
```

Signal 1: DAD1 C, Sig=210,8 Ref=360,100

| Peak # | RetTime [min] | Type | Width [min] | Area [mAU*s] | Height [mAU] | Area %  |
|--------|---------------|------|-------------|--------------|--------------|---------|
| 1      | 14.802        | BB   | 0.6313      | 922.25848    | 20.40525     | 16.7797 |
| 2      | 17.231        | BB   | 0.7421      | 4574.00781   | 92.30441     | 83.2203 |

```
Totals :                               5496.26630 112.70966
Signal 2: DAD1, Sig=221.00, 8.00 Ref=off, EXT
Signal has been modified after loading from rawdata file!
```

| Peak # | RetTime [min] | Type | Width [min] | Area [mAU*s] | Height [mAU] | Area %  |
|--------|---------------|------|-------------|--------------|--------------|---------|
| 1      | 14.809        | MM   | 0.7546      | 1038.75818   | 22.94155     | 16.7418 |
| 2      | 17.230        | MM   | 0.8327      | 5165.83838   | 103.39096    | 83.2582 |

```
Totals :                               6204.59656 126.33251
```

# **Table 3, entry 8:**

```
=====
Acq. Operator   :                               Seq. Line :    2
Acq. Instrument : LC 2                         Location  : Vial 2
Injection Date  : 3/13/2015 9:49:47 AM          Inj       :    1
                                           Inj Volume: 0.2 µl
```

```
Acq. Method     : C:\CHEM32\2\METHODS\FISCHER.M
Last changed    : 3/13/2015 8:25:45 AM
Analysis Method : C:\CHEM32\2\METHODS\DEF_LC.M
Last changed    : 8/26/2015 1:42:29 PM
                  (modified after loading)
```

Additional Info : Peak(s) manually integrated

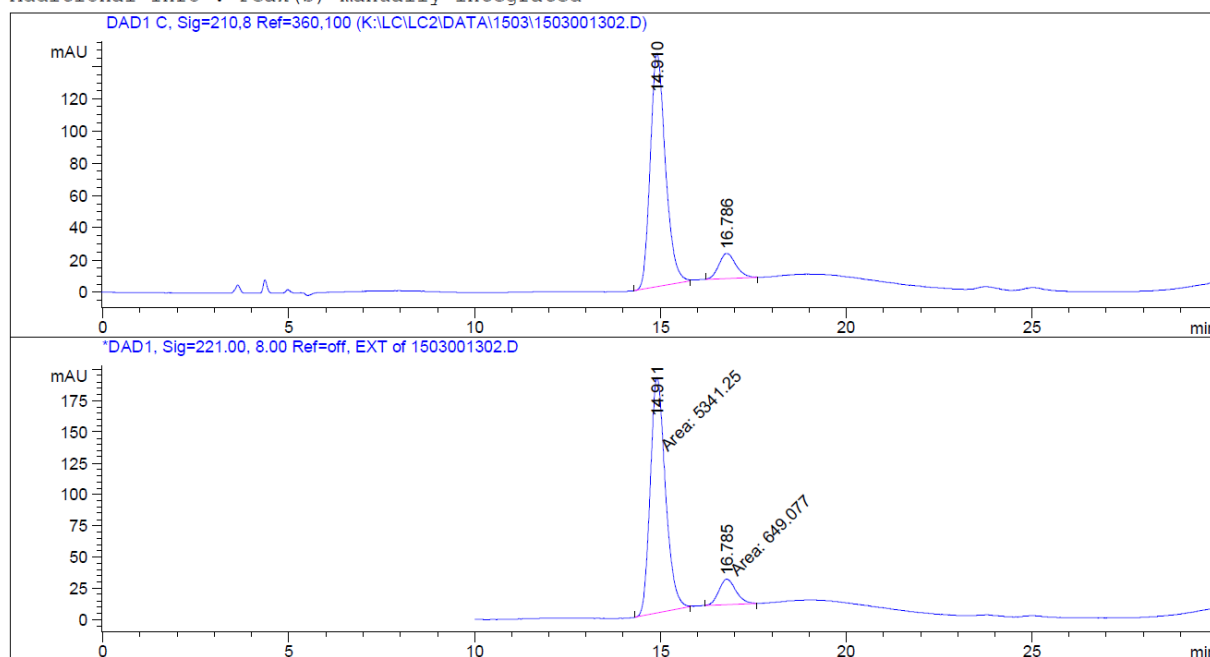

## Area Percent Report

```
=====
Sorted By      :      Signal
Multiplier:    :      1.0000
Dilution:      :      1.0000
Use Multiplier & Dilution Factor with ISTDs
```

Signal 1: DAD1 C, Sig=210,8 Ref=360,100

| Peak # | RetTime [min] | Type | Width [min] | Area [mAU*s] | Height [mAU] | Area %  |
|--------|---------------|------|-------------|--------------|--------------|---------|
| 1      | 14.910        | BB   | 0.4318      | 4113.48535   | 144.63231    | 89.1668 |
| 2      | 16.786        | BB   | 0.4208      | 499.76450    | 15.63947     | 10.8332 |

```
Totals :                               4613.24985  160.27178
Signal 2: DAD1, Sig=221.00, 8.00 Ref=off, EXT
Signal has been modified after loading from rawdata file!
```

| Peak # | RetTime [min] | Type | Width [min] | Area [mAU*s] | Height [mAU] | Area %  |
|--------|---------------|------|-------------|--------------|--------------|---------|
| 1      | 14.911        | MM   | 0.4729      | 5341.25195   | 188.23424    | 89.1646 |
| 2      | 16.785        | MM   | 0.5308      | 649.07733    | 20.38070     | 10.8354 |

```
Totals :                               5990.32928  208.61494
```

# **Table 3, entry 9:**

```
=====
Acq. Operator   :                               Seq. Line :    3
Acq. Instrument : LC 2                         Location  : Vial 3
Injection Date  : 3/13/2015 10:52:02 AM         Inj       :    1
                                           Inj Volume: 0.2 µl
```

```
Acq. Method     : C:\CHEM32\2\METHODS\FISCHER.M
Last changed    : 3/13/2015 8:25:45 AM
Analysis Method : C:\CHEM32\2\METHODS\DEF_LC.M
Last changed    : 8/26/2015 1:42:29 PM
                  (modified after loading)
```

Additional Info : Peak(s) manually integrated

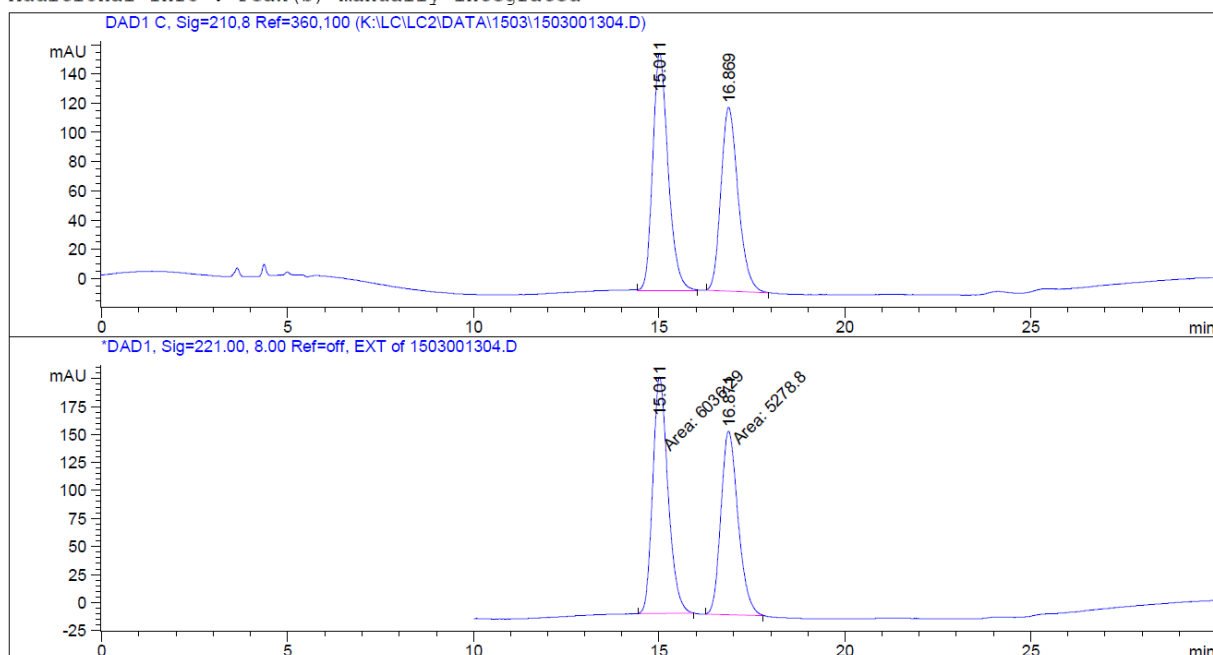

## Area Percent Report

```
Sorted By      :      Signal
Multiplier:    :      1.0000
Dilution:      :      1.0000
Use Multiplier & Dilution Factor with ISTDs
```

Signal 1: DAD1 C, Sig=210,8 Ref=360,100

| Peak # | RetTime [min] | Type | Width [min] | Area [mAU*s] | Height [mAU] | Area %  |
|--------|---------------|------|-------------|--------------|--------------|---------|
| 1      | 15.011        | BB   | 0.4439      | 4671.35059   | 162.26993    | 53.3722 |
| 2      | 16.869        | BB   | 0.4960      | 4081.04785   | 125.95349    | 46.6278 |

Totals : 8752.39844 288.22342  
Signal 2: DAD1, Sig=221.00, 8.00 Ref=off, EXT  
Signal has been modified after loading from rawdata file!

| Peak # | RetTime [min] | Type | Width [min] | Area [mAU*s] | Height [mAU] | Area %  |
|--------|---------------|------|-------------|--------------|--------------|---------|
| 1      | 15.011        | MM   | 0.4770      | 6036.29199   | 210.89539    | 53.3473 |
| 2      | 16.871        | MM   | 0.5366      | 5278.80078   | 163.95473    | 46.6527 |

Totals : 1.13151e4 374.85011



# Table 3, entry 10:

```
=====
Acq. Operator   :                               Seq. Line :    2
Acq. Instrument : LC 2                         Location  : Vial 2
Injection Date  : 1/27/2015 10:24:16 AM        Inj       :    1
                                           Inj Volume: 0.2 µl
```

```
Acq. Method     : C:\CHEM32\2\METHODS\FISCHER.M
Last changed    : 1/27/2015 9:20:55 AM
Analysis Method : C:\CHEM32\2\METHODS\DEF_LC.M
Last changed    : 8/26/2015 1:42:29 PM
                  (modified after loading)
```

Additional Info : Peak(s) manually integrated

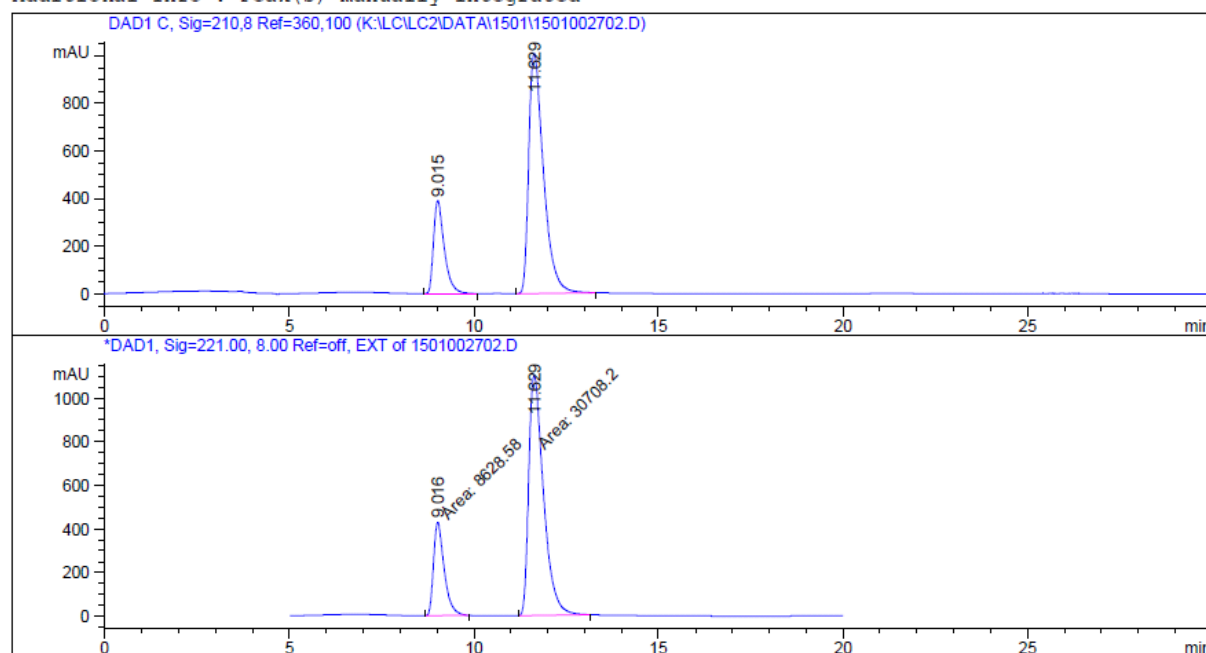

## Area Percent Report

```
Sorted By      :      Signal
Multiplier:    :      1.0000
Dilution:      :      1.0000
Use Multiplier & Dilution Factor with ISTDs
```

Signal 1: DAD1 C, Sig=210,8 Ref=360,100

| Peak # | RetTime [min] | Type | Width [min] | Area [mAU*s] | Height [mAU] | Area %  |
|--------|---------------|------|-------------|--------------|--------------|---------|
| 1      | 9.015         | BB   | 0.3066      | 7904.02979   | 389.77368    | 21.9532 |
| 2      | 11.629        | BB   | 0.4258      | 2.81000e4    | 1006.09882   | 78.0468 |

Totals : 3.60040e4 1395.87250  
Signal 2: DAD1, Sig=221.00, 8.00 Ref=off, EXT  
Signal has been modified after loading from rawdata file!

| Peak # | RetTime [min] | Type | Width [min] | Area [mAU*s] | Height [mAU] | Area %  |
|--------|---------------|------|-------------|--------------|--------------|---------|
| 1      | 9.016         | MM   | 0.3357      | 8628.58008   | 428.33780    | 21.9352 |
| 2      | 11.629        | MM   | 0.4650      | 3.07082e4    | 1100.62622   | 78.0648 |

Totals : 3.93368e4 1528.96402

# **Table 3, entry 11:**

```
=====
Acq. Operator   :                               Seq. Line :    3
Acq. Instrument : LC 2                         Location  : Vial 3
Injection Date  : 1/27/2015 11:26:26 AM         Inj       :    1
                                           Inj Volume: 0.2 µl
```

```
Acq. Method     : C:\CHEM32\2\METHODS\FISCHER.M
Last changed    : 1/27/2015 9:20:55 AM
Analysis Method : C:\CHEM32\2\METHODS\DEF_LC.M
Last changed    : 8/26/2015 1:42:29 PM
                  (modified after loading)
```

Additional Info : Peak(s) manually integrated

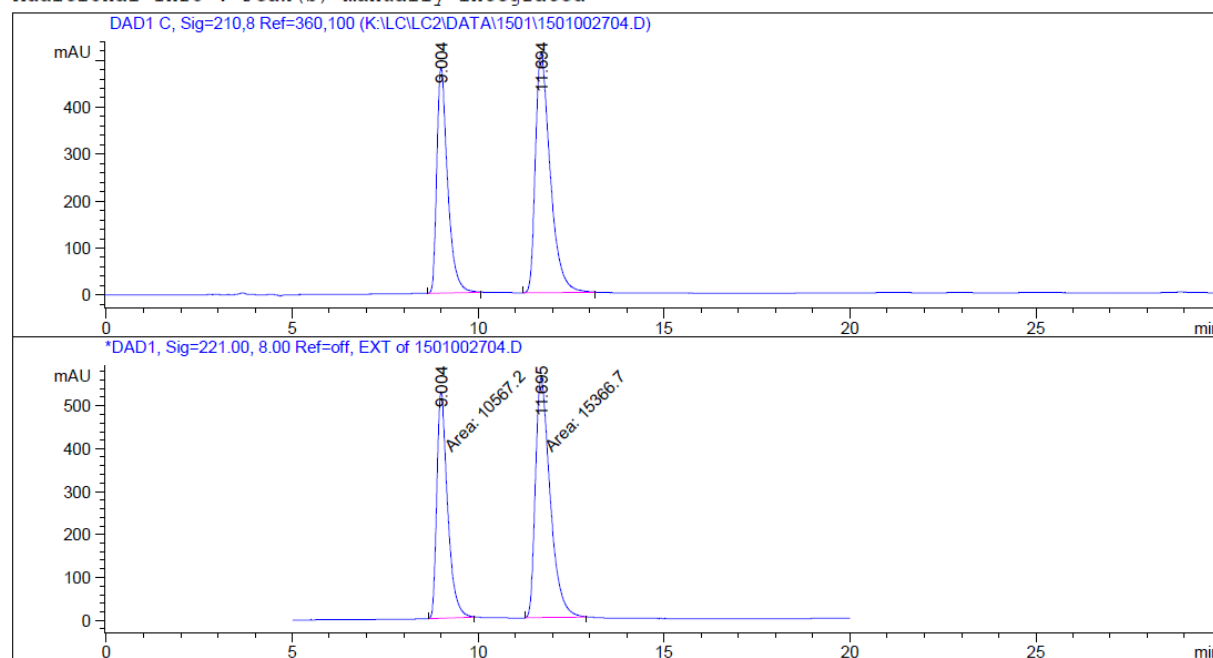

## Area Percent Report

```
Sorted By      :      Signal
Multiplier:    :      1.0000
Dilution:      :      1.0000
Use Multiplier & Dilution Factor with ISTDs
```

Signal 1: DAD1 C, Sig=210,8 Ref=360,100

| Peak # | RetTime [min] | Type | Width [min] | Area [mAU*s] | Height [mAU] | Area %  |
|--------|---------------|------|-------------|--------------|--------------|---------|
| 1      | 9.004         | BB   | 0.3033      | 9685.88672   | 480.34552    | 40.7177 |
| 2      | 11.694        | BB   | 0.4171      | 1.41020e4    | 509.23453    | 59.2823 |

Totals : 2.37879e4 989.58005  
Signal 2: DAD1, Sig=221.00, 8.00 Ref=off, EXT  
Signal has been modified after loading from rawdata file!

| Peak # | RetTime [min] | Type | Width [min] | Area [mAU*s] | Height [mAU] | Area %  |
|--------|---------------|------|-------------|--------------|--------------|---------|
| 1      | 9.004         | MM   | 0.3342      | 1.05672e4    | 526.97723    | 40.7466 |
| 2      | 11.695        | MM   | 0.4584      | 1.53667e4    | 558.66986    | 59.2534 |

Totals : 2.59338e4 1085.64709

# **Table 3, entry 13, fraction 2:**

```
=====
Acq. Operator   :                               Seq. Line :    1
Acq. Instrument : LC 2                         Location  : Vial 1
Injection Date  : 2/24/2015 12:06:10 PM         Inj       :    1
                                           Inj Volume: 0.2 µl
```

```
Acq. Method     : C:\CHEM32\2\METHODS\FISCHER.M
Last changed    : 2/24/2015 9:04:36 AM
Analysis Method : C:\CHEM32\2\METHODS\DEF_LC.M
Last changed    : 8/26/2015 1:42:29 PM
                (modified after loading)
```

Additional Info : Peak(s) manually integrated

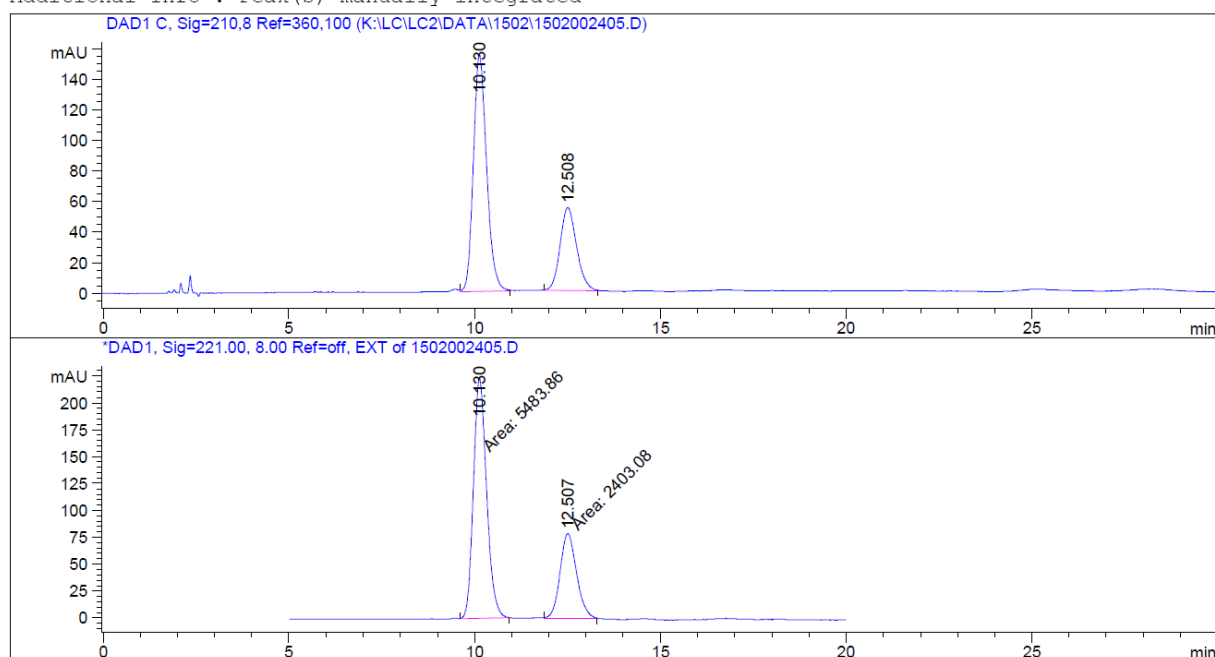

## Area Percent Report

```
=====
Sorted By      :      Signal
Multiplier:    :      1.0000
Dilution:      :      1.0000
Use Multiplier & Dilution Factor with ISTDs
```

Signal 1: DAD1 C, Sig=210,8 Ref=360,100

| Peak # | RetTime [min] | Type | Width [min] | Area [mAU*s] | Height [mAU] | Area %  |
|--------|---------------|------|-------------|--------------|--------------|---------|
| 1      | 10.130        | VB   | 0.3757      | 3817.41235   | 154.79221    | 69.5629 |
| 2      | 12.508        | BB   | 0.4711      | 1670.29871   | 54.26474     | 30.4371 |

```
Totals :                               5487.71106  209.05695
Signal 2: DAD1, Sig=221.00, 8.00 Ref=off, EXT
Signal has been modified after loading from rawdata file!
```

| Peak # | RetTime [min] | Type | Width [min] | Area [mAU*s] | Height [mAU] | Area %  |
|--------|---------------|------|-------------|--------------|--------------|---------|
| 1      | 10.130        | MM   | 0.4095      | 5483.85547   | 223.20137    | 69.5309 |
| 2      | 12.507        | MM   | 0.5099      | 2403.07959   | 78.54385     | 30.4691 |

```
Totals :                               7886.93506  301.74522
```

# **Table 4, entry 1:**

```
=====
Acq. Operator   :                               Seq. Line :    2
Acq. Instrument : LC 2                         Location  : Vial 2
Injection Date  : 1/15/2015 12:12:30 PM         Inj       :    1
                                           Inj Volume: 0.2 µl
```

```
Acq. Method     : C:\CHEM32\2\METHODS\FISCHER.M
Last changed    : 1/15/2015 9:35:55 AM
Analysis Method : C:\CHEM32\2\METHODS\FISCHER.M
Last changed    : 9/2/2015 2:38:40 PM
                  (modified after loading)
```

Additional Info : Peak(s) manually integrated

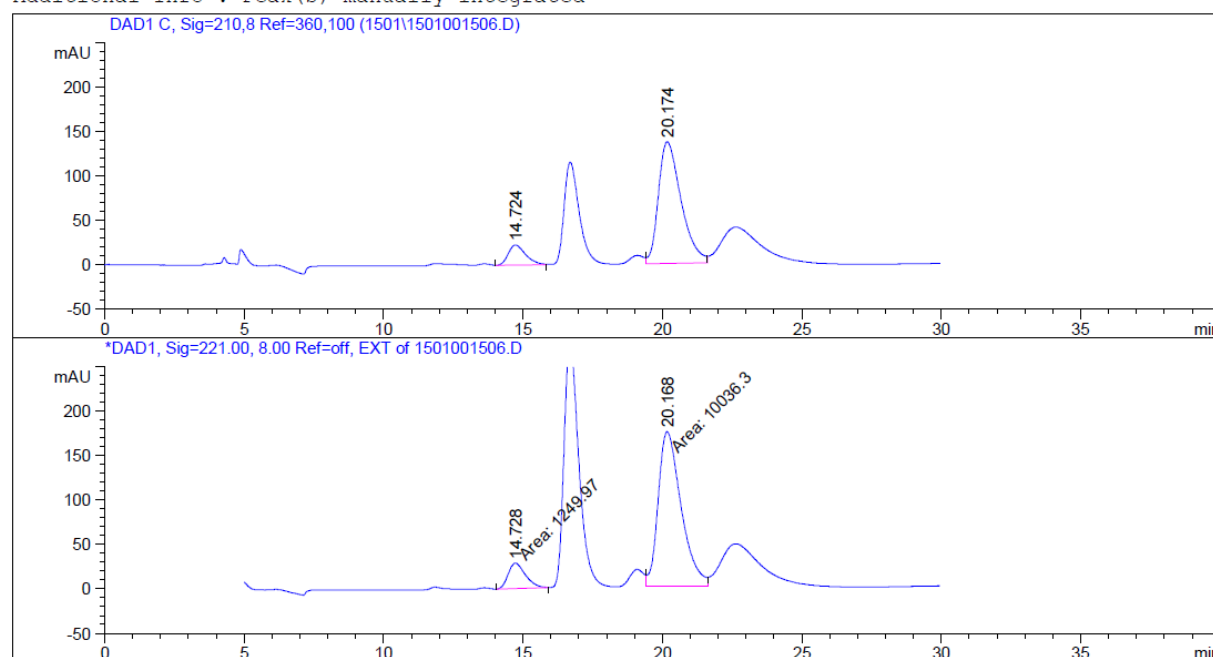

## Area Percent Report

```
Sorted By      :      Signal
Multiplier:    :      1.0000
Dilution:      :      1.0000
Use Multiplier & Dilution Factor with ISTDs
```

Signal 1: DAD1 C, Sig=210,8 Ref=360,100

| Peak # | RetTime [min] | Type | Width [min] | Area [mAU*s] | Height [mAU] | Area %  |
|--------|---------------|------|-------------|--------------|--------------|---------|
| 1      | 14.724        | VB   | 0.6075      | 971.99133    | 22.61041     | 11.1065 |
| 2      | 20.174        | VV   | 0.8427      | 7779.53174   | 136.96205    | 88.8935 |

Totals : 8751.52307 159.57246  
 Signal 2: DAD1, Sig=221.00, 8.00 Ref=off, EXT  
 Signal has been modified after loading from rawdata file!

| Peak # | RetTime [min] | Type | Width [min] | Area [mAU*s] | Height [mAU] | Area %  |
|--------|---------------|------|-------------|--------------|--------------|---------|
| 1      | 14.728        | MM   | 0.7234      | 1249.96912   | 28.79745     | 11.0751 |
| 2      | 20.168        | FM   | 0.9578      | 1.00363e4    | 174.64882    | 88.9249 |

Totals : 1.12863e4 203.44627

# **Table 4, entry 2:**

```
=====
Acq. Operator   :                               Seq. Line :    2
Acq. Instrument : LC 2                         Location  : Vial 2
Injection Date  : 3/18/2015 11:51:02 AM         Inj       :    1
                                           Inj Volume: 0.2 µl
```

```
Acq. Method     : C:\CHEM32\2\METHODS\FISCHER.M
Last changed    : 3/18/2015 10:27:46 AM
Analysis Method : C:\CHEM32\2\METHODS\FISCHER.M
Last changed    : 9/2/2015 11:47:09 AM
                  (modified after loading)
```

Additional Info : Peak(s) manually integrated

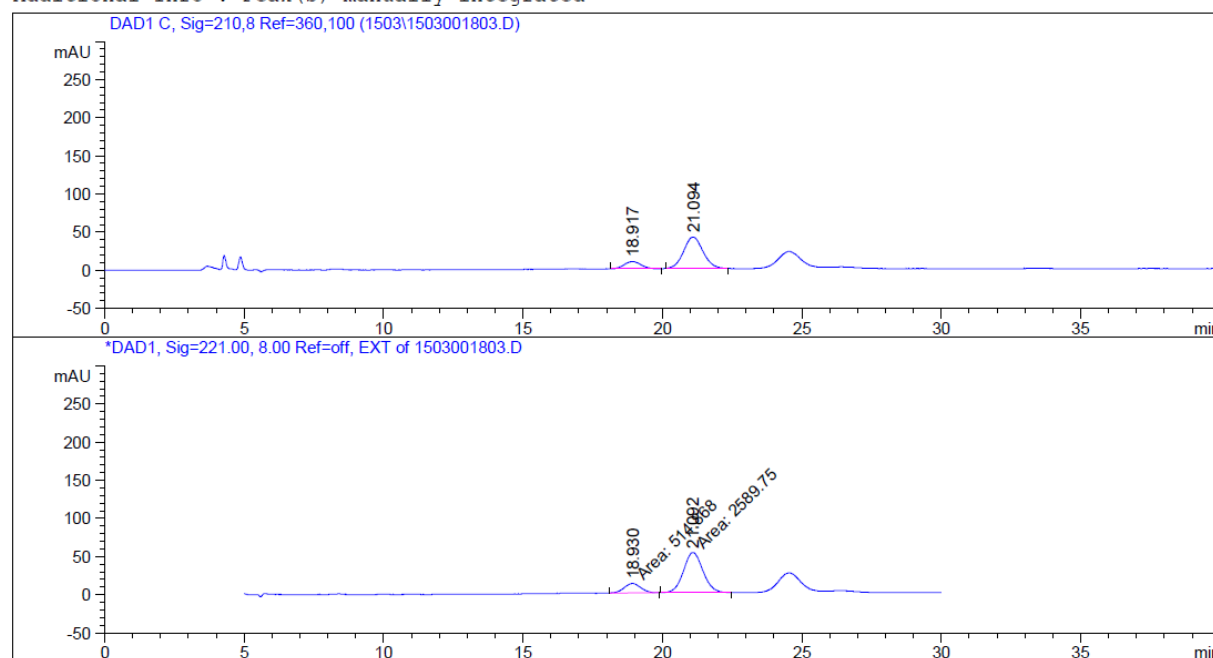

## Area Percent Report

```
Sorted By      :      Signal
Multiplier:    :      1.0000
Dilution:      :      1.0000
Use Multiplier & Dilution Factor with ISTDs
```

Signal 1: DAD1 C, Sig=210,8 Ref=360,100

| Peak # | RetTime [min] | Type | Width [min] | Area [mAU*s] | Height [mAU] | Area %  |
|--------|---------------|------|-------------|--------------|--------------|---------|
| 1      | 18.917        | BB   | 0.4976      | 401.98444    | 9.65834      | 16.5819 |
| 2      | 21.094        | BB   | 0.6839      | 2022.25647   | 41.54563     | 83.4181 |

```
Totals :                2424.24091  51.20397
Signal 2: DAD1, Sig=221.00, 8.00 Ref=off, EXT
Signal has been modified after loading from rawdata file!
```

| Peak # | RetTime [min] | Type | Width [min] | Area [mAU*s] | Height [mAU] | Area %  |
|--------|---------------|------|-------------|--------------|--------------|---------|
| 1      | 18.930        | MM   | 0.6909      | 514.86804    | 12.42091     | 16.5840 |
| 2      | 21.092        | MM   | 0.8152      | 2589.74683   | 52.94692     | 83.4160 |

```
Totals :                3104.61487  65.36782
```

# **Table 4, entry 5:**

Acq. Operator : Seq. Line : 3  
 Acq. Instrument : LC 2 Location : Vial 32  
 Injection Date : 10/7/2015 4:48:24 PM Inj : 1  
 Inj Volume : 0.4 µl  
 Actual Inj Volume : 0.1 µl  
 Different Inj Volume from Sequence !  
 Acq. Method : C:\CHEM32\2\METHODS\FISCHER.M  
 Last changed : 10/7/2015 4:17:08 PM  
 (modified after loading)  
 Analysis Method : C:\CHEM32\2\METHODS\JUNGK.M  
 Last changed : 10/8/2015 9:21:55 AM  
 (modified after loading)  
 Method Info : Cellulose2, Heptan/IEtOH 98:2, Fluß: 0.8 ml/min

Additional Info : Peak(s) manually integrated

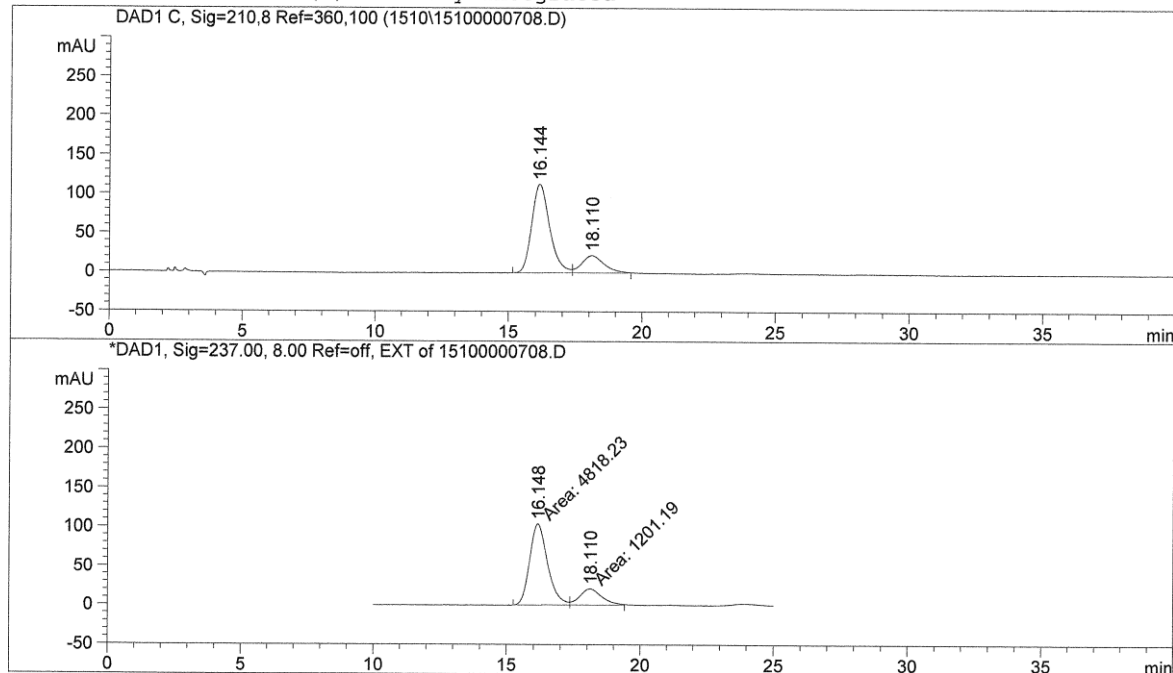

## Area Percent Report

Sorted By : Signal  
 Multiplier: : 1.0000  
 Dilution: : 1.0000  
 Use Multiplier & Dilution Factor with ISTDs

Signal 1: DAD1 C, Sig=210,8 Ref=360,100

| Peak # | RetTime [min] | Type | Width [min] | Area [mAU*s] | Height [mAU] | Area %  |
|--------|---------------|------|-------------|--------------|--------------|---------|
| 1      | 16.144        | VB   | 0.6774      | 5278.08447   | 113.31342    | 80.0891 |
| 2      | 18.110        | BB   | 0.6871      | 1312.17957   | 22.67734     | 19.9109 |

Totals : 6590.26404 135.99076

Signal 2: DAD1, Sig=237.00, 8.00 Ref=off, EXT

Signal has been modified after loading from rawdata file!

| Peak # | RetTime [min] | Type | Width [min] | Area [mAU*s] | Height [mAU] | Area %  |
|--------|---------------|------|-------------|--------------|--------------|---------|
| 1      | 16.148        | MF   | 0.7729      | 4818.23145   | 103.90434    | 80.0447 |
| 2      | 18.110        | FM   | 0.9599      | 1201.19116   | 20.85699     | 19.9553 |

Totals : 6019.42261 124.76133

## **References:**

- [1] Shibata, T.; Tsuchikama, K.; Otsuka, M. *Tetrahedron: Asymmetry* **2006**, *17*, 614-619.
- [2] Jungk, P.; Fischer, F.; Thiel, I.; Hapke, M. *J. Org. Chem.* **2015**, *80*, 9781-9793.
- [3] Knöpfel, T. F.; Aschwanden, P.; Ichikawa, T.; Watanabe, T.; Carreira, E. M. *Angew. Chem.* **2004**, *116*, 6097-6099; *Angew. Chem. Int. Ed.* **2004**, *43*, 5971-5973.
